# Supplementary material
Source: publisher figshare collection journal article supplement (https://acs.figshare.com/ndownloader/files/4779340)
Supplement: Supplementary file 1 [file 4779340]

## **Supporting Information**

### **Lipophilic Pyrylium Salts in the Synthesis of Efficient Pyridinium-based Cationic Lipids, Gemini Surfactants, and Lipophilic Oligomers for Gene Delivery**

**Marc Antoniu Ilies, William A. Seitz, Betty H. Johnson, Edward L. Ezell,  
Aaron L. Miller, E. Brad Thompson, and Alexandru T. Balaban<sup>\*</sup>**

Summary:

1. Complete characterization of the investigated compounds;
2. Elemental analysis data for the compounds described in the paper

## 1. Characterization of the investigated compounds

**4,6-Dimethyl-2-decylpyrylium hexafluorophosphate 14a:** mp 67.6 °C; Yield 27%; <sup>1</sup>H-NMR (CDCl<sub>3</sub>), δ, ppm: 7.70 (d, *J* = 1.7 Hz, 1H, H-5 pyrylium), 7.62 (d, *J* = 1.7 Hz, 1H, H-3 pyrylium), 3.07 (t, *J* = 7.8 Hz, 2H, Cα-CH<sub>2</sub>), 2.86 (s, 3H, CH<sub>3</sub> α-pyrylium), 2.69 (s, 3H, CH<sub>3</sub> γ-pyrylium), 1.82 (quin, *J* = 7.7 Hz, 2H, Cα-CH<sub>2</sub>CH<sub>2</sub>), 1.40 (m, *J* = 7.7 Hz, 2H, Cα-CH<sub>2</sub>CH<sub>2</sub>CH<sub>2</sub>), 1.25 (m, 12H, 6 CH<sub>2</sub> from n-alkyl chain), 0.88 (t, *J* = 6.7 Hz, 3H, CH<sub>3</sub> from n-alkyl chain); <sup>13</sup>C-NMR (CDCl<sub>3</sub>), δ, ppm: 181.0 (C-2 pyrylium), 177.7 (C-6 pyrylium), 174.7 (C-4 pyrylium), 123.8 (C-5 pyrylium), 122.5 (C-3 pyrylium), 34.7 (Cα-CH<sub>2</sub>-), 31.8, 29.4, 29.3, 29.2, 29.0 (2C), 27.0 (all from n-alkyl chain), 23.5 (CH<sub>3</sub> γ-pyrylium), 22.6 (n-alkyl chain), 21.1 (CH<sub>3</sub> α-pyrylium), 14.0 (CH<sub>3</sub> from n-alkyl chain). Anal. (C<sub>17</sub>H<sub>29</sub>O<sup>+</sup> PF<sub>6</sub><sup>-</sup>), C, H.

**4,6-Dimethyl-2-undecylpyrylium hexafluorophosphate 14b:** mp 62.8 °C; Yield 21%; <sup>1</sup>H-NMR (CDCl<sub>3</sub>), δ, ppm: 7.70 (d, *J* = 1.8 Hz, 1H, H-5 pyrylium), 7.62 (d, *J* = 1.8 Hz, 1H, H-3 pyrylium), 3.06 (t, *J* = 7.8 Hz, 2H, Cα-CH<sub>2</sub>), 2.85 (s, 3H, CH<sub>3</sub> α-pyrylium), 2.68 (s, 3H, CH<sub>3</sub> γ-pyrylium), 1.83 (quin, *J* = 7.7 Hz, 2H, Cα-CH<sub>2</sub>CH<sub>2</sub>), 1.40 (m, *J* = 7.7 Hz, 2H, Cα-CH<sub>2</sub>CH<sub>2</sub>CH<sub>2</sub>), 1.25 (m, 14H, 7 CH<sub>2</sub> from n-alkyl chain), 0.87 (t, *J* = 6.7 Hz, 3H, CH<sub>3</sub> from n-alkyl chain); <sup>13</sup>C-NMR (CDCl<sub>3</sub>), δ, ppm: 180.9 (C-2 pyrylium), 177.7 (C-6 pyrylium), 174.7 (C-4 pyrylium), 123.8 (C-5 pyrylium), 122.5 (C-3 pyrylium), 34.6 (Cα-CH<sub>2</sub>-), 31.8, 29.5, 29.3, 29.2, 29.0 (2C), 27.0 (all from n-alkyl chain), 23.4 (CH<sub>3</sub> γ-pyrylium), 22.6 (n-alkyl chain), 21.0 (CH<sub>3</sub> α-pyrylium), 14.0 (CH<sub>3</sub> from n-alkyl chain). Anal. (C<sub>18</sub>H<sub>31</sub>O<sup>+</sup> PF<sub>6</sub><sup>-</sup>), C, H.

**4,6-Dimethyl-2-dodecylpyrylium hexafluorophosphate 14c:** mp 78.7 °C; Yield 31%; <sup>1</sup>H-NMR (CDCl<sub>3</sub>), δ, ppm: 7.69 (d, *J* = 1.8 Hz, 1H, H-5 pyrylium), 7.61 (d, *J* = 1.8 Hz, 1H, H-3 pyrylium), 3.05 (t, *J* = 7.8 Hz, 2H, Cα-CH<sub>2</sub>), 2.85 (s, 3H, CH<sub>3</sub> α-pyrylium), 2.68 (s, 3H, CH<sub>3</sub> γ-pyrylium), 1.80 (quin, *J* = 7.7 Hz, 2H, Cα-CH<sub>2</sub>CH<sub>2</sub>), 1.40 (m, *J* = 7.7 Hz, 2H, Cα-CH<sub>2</sub>CH<sub>2</sub>CH<sub>2</sub>), 1.25 (m, 16H, 8 CH<sub>2</sub> from n-alkyl chain), 0.87 (t, *J* = 6.7 Hz, 3H, CH<sub>3</sub> from n-alkyl chain); <sup>13</sup>C-NMR (CDCl<sub>3</sub>), δ, ppm: 180.9 (C-2 pyrylium), 177.7 (C-

6 pyrylium), 174.7 (C-4 pyrylium), 123.8 (C-5 pyrylium), 122.5 (C-3 pyrylium), 34.6 (C $\alpha$ -CH<sub>2</sub>-), 31.8, 29.6, 29.5, 29.3, 29.3, 29.0 (2C), 27.0 (all from n-alkyl chain), 23.5 (CH<sub>3</sub>  $\gamma$ -pyrylium), 22.6 (n-alkyl chain), 21.2 (CH<sub>3</sub>  $\alpha$ -pyrylium), 14.1 (CH<sub>3</sub> from n-alkyl chain). Anal. (C<sub>19</sub>H<sub>33</sub>O<sup>+</sup> PF<sub>6</sub><sup>-</sup>), C, H.

**4,6-Dimethyl-2-tridecylpyrylium hexafluorophosphate 14d:** mp 73.3 °C; Yield 19%; <sup>1</sup>H-NMR (CDCl<sub>3</sub>),  $\delta$ , ppm: 7.69 (s, 1H, H-5 pyrylium), 7.61 (s, 1H, H-3 pyrylium), 3.05 (t,  $J$  = 7.8 Hz, 2H, C $\alpha$ -CH<sub>2</sub>), 2.84 (s, 3H, CH<sub>3</sub>  $\alpha$ -pyrylium), 2.67 (s, 3H, CH<sub>3</sub>  $\gamma$ -pyrylium), 1.80 (quin,  $J$  = 7.7 Hz, 2H, C $\alpha$ -CH<sub>2</sub>CH<sub>2</sub>), 1.39 (m,  $J$  = 7.7 Hz, 2H, C $\alpha$ -CH<sub>2</sub>CH<sub>2</sub>CH<sub>2</sub>), 1.25 (m, 18H, 9 CH<sub>2</sub> from n-alkyl chain), 0.87 (t,  $J$  = 6.7 Hz, 3H, CH<sub>3</sub> from n-alkyl chain); <sup>13</sup>C-NMR (CDCl<sub>3</sub>),  $\delta$ , ppm: 180.8 (C-2 pyrylium), 177.6 (C-6 pyrylium), 174.6 (C-4 pyrylium), 123.7 (C-5 pyrylium), 122.4 (C-3 pyrylium), 34.5 (C $\alpha$ -CH<sub>2</sub>-), 31.8, 29.6, 29.5, 29.5, 29.3, 29.2, 29.0 (2C), 26.9 (all from n-alkyl chain), 23.3 (CH<sub>3</sub>  $\gamma$ -pyrylium), 22.6 (n-alkyl chain), 20.9 (CH<sub>3</sub>  $\alpha$ -pyrylium), 14.0 (CH<sub>3</sub> from n-alkyl chain). Anal. (C<sub>20</sub>H<sub>35</sub>O<sup>+</sup> PF<sub>6</sub><sup>-</sup>), C, H.

**4,6-Dimethyl-2-tetradecylpyrylium hexafluorophosphate 14e:** mp 85.2 °C; Yield 32%; <sup>1</sup>H-NMR (CDCl<sub>3</sub>),  $\delta$ , ppm: 7.70 (s, 1H, H-5 pyrylium), 7.61 (s, 1H, H-3 pyrylium), 3.06 (t,  $J$  = 7.6 Hz, 2H, C $\alpha$ -CH<sub>2</sub>), 2.86 (s, 3H, CH<sub>3</sub>  $\alpha$ -pyrylium), 2.69 (s, 3H, CH<sub>3</sub>  $\gamma$ -pyrylium), 1.80 (quin,  $J$  = 7.6 Hz, 2H, C $\alpha$ -CH<sub>2</sub>CH<sub>2</sub>), 1.40 (m,  $J$  = 7.7 Hz, 2H, C $\alpha$ -CH<sub>2</sub>CH<sub>2</sub>CH<sub>2</sub>), 1.25 (m, 20H, 10 CH<sub>2</sub> from n-alkyl chain), 0.87 (t,  $J$  = 6.8 Hz, 3H, CH<sub>3</sub> from n-alkyl chain); <sup>13</sup>C-NMR (CDCl<sub>3</sub>),  $\delta$ , ppm: 180.9 (C-2 pyrylium), 177.7 (C-6 pyrylium), 174.7 (C-4 pyrylium), 123.8 (C-5 pyrylium), 122.5 (C-3 pyrylium), 34.7 (C $\alpha$ -CH<sub>2</sub>-), 31.9, 29.6 (4C), 29.5, 29.3 (2C), 29.0 (2C), 27.0 (all from n-alkyl chain), 23.5 (CH<sub>3</sub>  $\gamma$ -pyrylium), 22.6 (n-alkyl chain), 21.1 (CH<sub>3</sub>  $\alpha$ -pyrylium), 14.0 (CH<sub>3</sub> from n-alkyl chain). Anal. (C<sub>21</sub>H<sub>37</sub>O<sup>+</sup> PF<sub>6</sub><sup>-</sup>), C, H.

**4,6-Dimethyl-2-pentadecylpyrylium hexafluorophosphate 14f:** mp 79.8 °C; Yield 25%; <sup>1</sup>H-NMR (CDCl<sub>3</sub>),  $\delta$ , ppm: 7.70 (s, 1H, H-5 pyrylium), 7.62 (s, 1H, H-3 pyrylium), 3.06 (t,  $J$  = 7.6 Hz, 2H, C $\alpha$ -CH<sub>2</sub>), 2.86 (s, 3H, CH<sub>3</sub>  $\alpha$ -pyrylium), 2.69 (s, 3H, CH<sub>3</sub>  $\gamma$ -pyrylium), 1.81 (quin,  $J$  = 7.6 Hz, 2H, C $\alpha$ -CH<sub>2</sub>CH<sub>2</sub>), 1.40 (m,  $J$  = 7.7 Hz, 2H, C $\alpha$ -CH<sub>2</sub>CH<sub>2</sub>CH<sub>2</sub>), 1.25 (m, 22H, 11 CH<sub>2</sub> from n-alkyl chain), 0.88 (t,  $J$  = 6.8 Hz, 3H, CH<sub>3</sub>

from n-alkyl chain);  $^{13}\text{C}$ -NMR ( $\text{CDCl}_3$ ),  $\delta$ , ppm: 180.9 (C-2 pyrylium), 177.7 (C-6 pyrylium), 174.7 (C-4 pyrylium), 123.7 (C-5 pyrylium), 122.5 (C-3 pyrylium), 34.6 ( $\text{C}\alpha\text{-CH}_2\text{-}$ ), 31.8, 29.7, 29.6, 29.5, 29.3, 29.0 (2C), 27.0 (all from n-alkyl chain), 23.4 ( $\text{CH}_3\ \gamma\text{-pyrylium}$ ), 22.6 (n-alkyl chain), 21.1 ( $\text{CH}_3\ \alpha\text{-pyrylium}$ ), 14.0 ( $\text{CH}_3$  from n-alkyl chain). Anal. ( $\text{C}_{22}\text{H}_{39}\text{O}^+ \text{PF}_6^-$ ), C, H.

**4,6-Dimethyl-2-hexadecylpyrylium hexafluorophosphate 14g:** mp 88.1 °C; Yield 26%;  $^1\text{H}$ -NMR ( $\text{CDCl}_3$ ),  $\delta$ , ppm: 7.70 (s, 1H, H-5 pyrylium), 7.61 (s, 1H, H-3 pyrylium), 3.06 (t,  $J = 7.6$  Hz, 2H,  $\text{C}\alpha\text{-CH}_2\text{-}$ ), 2.86 (s, 3H,  $\text{CH}_3\ \alpha\text{-pyrylium}$ ), 2.69 (s, 3H,  $\text{CH}_3\ \gamma\text{-pyrylium}$ ), 1.81 (quin,  $J = 7.0$  Hz, 2H,  $\text{C}\alpha\text{-CH}_2\text{CH}_2\text{-}$ ), 1.40 (m, 2H,  $\text{C}\alpha\text{-CH}_2\text{CH}_2\text{CH}_2\text{-}$ ), 1.25 (m, 24H, 12  $\text{CH}_2$  from n-alkyl chain), 0.87 (t,  $J = 6.7$  Hz, 3H,  $\text{CH}_3$  from n-alkyl chain);  $^{13}\text{C}$ -NMR ( $\text{CDCl}_3$ ),  $\delta$ , ppm: 180.9 (C-2 pyrylium), 177.7 (C-6 pyrylium), 174.7 (C-4 pyrylium), 123.8 (C-5 pyrylium), 122.5 (C-3 pyrylium), 34.6 ( $\text{C}\alpha\text{-CH}_2\text{-}$ ), 31.9, 29.7, 29.6, 29.5, 29.3, 29.3, 29.1 (2C), 27.0 (all from n-alkyl chain), 23.5 ( $\text{CH}_3\ \gamma\text{-pyrylium}$ ), 22.6 (n-alkyl chain), 21.1 ( $\text{CH}_3\ \alpha\text{-pyrylium}$ ), 14.1 ( $\text{CH}_3$  from n-alkyl chain). Anal. ( $\text{C}_{23}\text{H}_{41}\text{O}^+ \text{PF}_6^-$ ), C, H.

**4,6-Dimethyl-2-heptadecylpyrylium hexafluorophosphate 14h:** mp 81.8 °C; Yield 20%;  $^1\text{H}$ -NMR ( $\text{CDCl}_3$ ),  $\delta$ , ppm: 7.71 (s, 1H, H-5 pyrylium), 7.61 (s, 1H, H-3 pyrylium), 3.07 (t,  $J = 7.8$  Hz, 2H,  $\text{C}\alpha\text{-CH}_2\text{-}$ ), 2.86 (s, 3H,  $\text{CH}_3\ \alpha\text{-pyrylium}$ ), 2.69 (s, 3H,  $\text{CH}_3\ \gamma\text{-pyrylium}$ ), 1.81 (quin,  $J = 7.6$  Hz, 2H,  $\text{C}\alpha\text{-CH}_2\text{CH}_2\text{-}$ ), 1.40 (m,  $J = 7.7$  Hz, 2H,  $\text{C}\alpha\text{-CH}_2\text{CH}_2\text{CH}_2\text{-}$ ), 1.25 (m, 26H, 13  $\text{CH}_2$  from n-alkyl chain), 0.88 (t,  $J = 6.6$  Hz, 3H,  $\text{CH}_3$  from n-alkyl chain);  $^{13}\text{C}$ -NMR ( $\text{CDCl}_3$ ),  $\delta$ , ppm: 180.9 (C-2 pyrylium), 177.7 (C-6 pyrylium), 174.7 (C-4 pyrylium), 123.8 (C-5 pyrylium), 122.5 (C-3 pyrylium), 34.7 ( $\text{C}\alpha\text{-CH}_2\text{-}$ ), 31.9, 29.7, 29.6, 29.5, 29.3, 29.3, 29.1 (2C), 27.0 (all from n-alkyl chain), 23.5 ( $\text{CH}_3\ \gamma\text{-pyrylium}$ ), 22.6 (n-alkyl chain), 21.1 ( $\text{CH}_3\ \alpha\text{-pyrylium}$ ), 14.1 ( $\text{CH}_3$  from n-alkyl chain). Anal. ( $\text{C}_{24}\text{H}_{43}\text{O}^+ \text{PF}_6^-$ ), C, H.

**4,6-Dimethyl-1,2-didecylpyridinium hexafluorophosphate 15:**  $T_c = 46.9$  °C; Yield 65%;  $^1\text{H}$ -NMR ( $\text{CDCl}_3$ ),  $\delta$ , ppm: 7.47 (s, 1H, H-5 pyridinium), 7.40 (s, 1H, H-3 pyridinium), 4.35 (t,  $J = 8.6$  Hz, 2H,  $\text{N-CH}_2\text{-}$ ), 2.94 (t,  $J = 8.0$  Hz, 2H,  $\text{C}\alpha\text{-CH}_2\text{-}$ ), 2.78 (s, 3H,  $\text{CH}_3\ \alpha\text{-pyridinium}$ ), 2.52 (s, 3H,  $\text{CH}_3\ \gamma\text{-pyridinium}$ ), 1.76 (m, 4H, N- and  $\text{C}\alpha\text{-}$

CH<sub>2</sub>CH<sub>2</sub>), 1.46 (m, 4H, N- and C $\alpha$ -CH<sub>2</sub>CH<sub>2</sub>CH<sub>2</sub>), 1.25 (m, 24H, 12 CH<sub>2</sub> from n-alkyl chains), 0.88 (t,  $J$  = 6.8 Hz, 6H, 2 CH<sub>3</sub> from n-alkyl chains); <sup>13</sup>C-NMR (CDCl<sub>3</sub>),  $\delta$ , ppm: 157.9 (C-4 pyridinium), 157.2 (C-2 pyridinium), 154.0 (C-6 pyridinium), 128.9 (C-5 pyridinium), 127.2 (C-3 pyridinium), 51.7 (N-CH<sub>2</sub>-), 33.0 (C $\alpha$ -CH<sub>2</sub>-), 31.8, 31.8, 29.5, 29.4 (2C), 29.4, 29.3 (2C), 29.2, 29.2, 29.1, 28.9, 28.7, 26.6, 22.6 (2C), (all from n-alkyl chains), 21.5 (CH<sub>3</sub>  $\gamma$ -pyridinium), 20.9 (CH<sub>3</sub>  $\alpha$ -pyridinium), 14.1 (2 CH<sub>3</sub> from n-alkyl chains). Anal. (C<sub>27</sub>H<sub>50</sub>N<sup>+</sup> PF<sub>6</sub><sup>-</sup>), C, H, N.

**4,6-Dimethyl-1-dodecyl-2-decylpyridinium hexafluorophosphate 16:**  $T_c$  = 56.7 °C; Yield 71%; <sup>1</sup>H-NMR (CDCl<sub>3</sub>),  $\delta$ , ppm: 7.47 (s, 1H, H-5 pyridinium), 7.40 (s, 1H, H-3 pyridinium), 4.35 (t,  $J$  = 8.4 Hz, 2H, N-CH<sub>2</sub>), 2.94 (t,  $J$  = 8.0 Hz, 2H, C $\alpha$ -CH<sub>2</sub>), 2.78 (s, 3H, CH<sub>3</sub>  $\alpha$ -pyridinium), 2.51 (s, 3H, CH<sub>3</sub>  $\gamma$ -pyridinium), 1.76 (m, 4H, N- and C $\alpha$ -CH<sub>2</sub>CH<sub>2</sub>), 1.46 (m, 4H, N- and C $\alpha$ -CH<sub>2</sub>CH<sub>2</sub>CH<sub>2</sub>), 1.25 (m, 28H, 14 CH<sub>2</sub> from n-alkyl chains), 0.88 (t,  $J$  = 6.8 Hz, 6H, 2 CH<sub>3</sub> from n-alkyl chains); <sup>13</sup>C-NMR (CDCl<sub>3</sub>),  $\delta$ , ppm: 157.9 (C-4 pyridinium), 157.2 (C-2 pyridinium), 153.9 (C-6 pyridinium), 128.9 (C-5 pyridinium), 127.2 (C-3 pyridinium), 51.7 (N-CH<sub>2</sub>-), 33.0 (C $\alpha$ -CH<sub>2</sub>-), 31.9, 29.6, 29.5, 29.4 (3C), 29.3 (4C), 29.2, 29.1, 28.9, 28.7, 26.6, 22.6 (all from n-alkyl chains), 21.5 (CH<sub>3</sub>  $\gamma$ -pyridinium), 20.9 (CH<sub>3</sub>  $\alpha$ -pyridinium), 14.1 (2 CH<sub>3</sub> from n-alkyl chains). Anal. (C<sub>29</sub>H<sub>54</sub>N<sup>+</sup> PF<sub>6</sub><sup>-</sup>), C, H, N.

**4,6-Dimethyl-1-decyl-2-undecylpyridinium hexafluorophosphate 17:**  $T_c$  = 52.2 °C; Yield 69%; <sup>1</sup>H-NMR (CDCl<sub>3</sub>),  $\delta$ , ppm: 7.49 (d,  $J$ =2.0 Hz, 1H, H-5 pyridinium), 7.40 (d,  $J$ =2.0 Hz, 1H, H-3 pyridinium), 4.42 (t,  $J$  = 8.4 Hz, 2H, N-CH<sub>2</sub>), 2.97 (t,  $J$  = 8.0 Hz, 2H, C $\alpha$ -CH<sub>2</sub>), 2.83 (s, 3H, CH<sub>3</sub>  $\alpha$ -pyridinium), 2.53 (s, 3H, CH<sub>3</sub>  $\gamma$ -pyridinium), 1.75 (m, 4H, N- and C $\alpha$ -CH<sub>2</sub>CH<sub>2</sub>), 1.47 (m, 4H, N- and C $\alpha$ -CH<sub>2</sub>CH<sub>2</sub>CH<sub>2</sub>), 1.26 (m, 26H, 13 CH<sub>2</sub> from n-alkyl chains), 0.87 (t,  $J$  = 6.8 Hz, 6H, 2 CH<sub>3</sub> from n-alkyl chains); <sup>13</sup>C-NMR (CDCl<sub>3</sub>),  $\delta$ , ppm: 157.5 (C-4 pyridinium), 157.3 (C-2 pyridinium), 154.3 (C-6 pyridinium), 128.8 (C-5 pyridinium), 126.9 (C-3 pyridinium), 51.8 (N-CH<sub>2</sub>-), 33.0 (C $\alpha$ -CH<sub>2</sub>-), 31.9, 31.8, 29.5 (2C), 29.4 (3C), 29.3, 29.2, 29.1, 28.9, 28.6, 26.6, 22.7, 22.6 (all from n-alkyl chains), 21.6 (CH<sub>3</sub>  $\gamma$ -pyridinium), 21.1 (CH<sub>3</sub>  $\alpha$ -pyridinium), 14.1 (2 CH<sub>3</sub> from n-alkyl chains). Anal. (C<sub>28</sub>H<sub>52</sub>N<sup>+</sup> PF<sub>6</sub><sup>-</sup>), C, H, N.

**4,6-Dimethyl-1-dodecyl-2-undecylpyridinium hexafluorophosphate 18:**  $T_c = 54.8\text{ }^\circ\text{C}$ ; Yield 60%;  $^1\text{H-NMR}$  ( $\text{CDCl}_3$ ),  $\delta$ , ppm: 7.47 (d,  $J=2.3\text{ Hz}$ , 1H, H-5 pyridinium), 7.40 (d,  $J=2.3\text{ Hz}$ , 1H, H-3 pyridinium), 4.36 (t,  $J = 8.5\text{ Hz}$ , 2H, N- $\underline{\text{CH}_2}$ ), 2.94 (t,  $J = 8.0\text{ Hz}$ , 2H, C $\alpha$ - $\underline{\text{CH}_2}$ ), 2.79 (s, 3H,  $\text{CH}_3$   $\alpha$ -pyridinium), 2.52 (s, 3H,  $\text{CH}_3$   $\gamma$ -pyridinium), 1.75 (m, 4H, N- and C $\alpha$ - $\text{CH}_2\text{CH}_2$ ), 1.47 (m, 4H, N- and C $\alpha$ - $\text{CH}_2\text{CH}_2\text{CH}_2$ ), 1.26 (m, 30H, 15  $\text{CH}_2$  from n-alkyl chains), 0.88 (t,  $J = 6.8\text{ Hz}$ , 6H, 2  $\text{CH}_3$  from n-alkyl chains);  $^{13}\text{C-NMR}$  ( $\text{CDCl}_3$ ),  $\delta$ , ppm: 157.8 (C-4 pyridinium), 157.2 (C-2 pyridinium), 153.9 (C-6 pyridinium), 128.9 (C-5 pyridinium), 127.2 (C-3 pyridinium), 51.7 (N- $\underline{\text{CH}_2}$ -), 33.0 (C $\alpha$ - $\underline{\text{CH}_2}$ -), 31.9, 29.6 (2C), 29.4 (2C), 29.3 (3C), 29.1, 28.9, 28.7, 26.6, 22.6 (all from n-alkyl chains), 21.5 ( $\text{CH}_3$   $\gamma$ -pyridinium), 20.9 ( $\text{CH}_3$   $\alpha$ -pyridinium), 14.1 (2  $\text{CH}_3$  from n-alkyl chains). Anal. ( $\text{C}_{30}\text{H}_{56}\text{N}^+ \text{PF}_6^-$ ), C, H, N.

**4,6-Dimethyl-1-decyl-2-dodecylpyridinium hexafluorophosphate 19:**  $T_c = 57.6\text{ }^\circ\text{C}$ ; Yield 72%;  $^1\text{H-NMR}$  ( $\text{CDCl}_3$ ),  $\delta$ , ppm: 7.47 (d,  $J = 2.0\text{ Hz}$ , 1H, H-5 pyridinium), 7.40 (d,  $J=2.0\text{ Hz}$ , 1H, H-3 pyridinium), 4.35 (t,  $J = 8.6\text{ Hz}$ , 2H, N- $\underline{\text{CH}_2}$ ), 2.94 (t,  $J = 8.0\text{ Hz}$ , 2H, C $\alpha$ - $\underline{\text{CH}_2}$ ), 2.78 (s, 3H,  $\text{CH}_3$   $\alpha$ -pyridinium), 2.51 (s, 3H,  $\text{CH}_3$   $\gamma$ -pyridinium), 1.76 (m, 4H, N- and C $\alpha$ - $\text{CH}_2\text{CH}_2$ ), 1.48 (m, 4H, N- and C $\alpha$ - $\text{CH}_2\text{CH}_2\text{CH}_2$ ), 1.26 (m, 28H, 14  $\text{CH}_2$  from n-alkyl chains), 0.87 (t,  $J = 6.8\text{ Hz}$ , 6H, 2  $\text{CH}_3$  from n-alkyl chains);  $^{13}\text{C-NMR}$  ( $\text{CDCl}_3$ ),  $\delta$ , ppm: 157.9 (C-4 pyridinium), 157.2 (C-2 pyridinium), 153.9 (C-6 pyridinium), 128.9 (C-5 pyridinium), 127.2 (C-3 pyridinium), 51.7 (N- $\underline{\text{CH}_2}$ -), 33.0 (C $\alpha$ - $\underline{\text{CH}_2}$ -), 31.9, 31.8, 29.6 (2C), 29.5, 29.4 (2C), 29.3 (2C), 29.2, 29.1, 28.9, 28.7, 26.6, 22.6 (2C) (all from n-alkyl chains), 21.5 ( $\text{CH}_3$   $\gamma$ -pyridinium), 20.9 ( $\text{CH}_3$   $\alpha$ -pyridinium), 14.1 (2  $\text{CH}_3$  from n-alkyl chains). Anal. ( $\text{C}_{29}\text{H}_{54}\text{N}^+ \text{PF}_6^-$ ), C, H, N.

**4,6-Dimethyl-1,2-didodecylpyridinium hexafluorophosphate 20:**  $T_c = 58.6\text{ }^\circ\text{C}$ ; Yield 63%;  $^1\text{H-NMR}$  ( $\text{CDCl}_3$ ),  $\delta$ , ppm: 7.46 (d,  $J=2.0\text{ Hz}$ , 1H, H-5 pyridinium), 7.40 (d,  $J = 2.0\text{ Hz}$ , 1H, H-3 pyridinium), 4.35 (t,  $J = 8.5\text{ Hz}$ , 2H, N- $\underline{\text{CH}_2}$ ), 2.93 (t,  $J = 8.0\text{ Hz}$ , 2H, C $\alpha$ - $\underline{\text{CH}_2}$ ), 2.78 (s, 3H,  $\text{CH}_3$   $\alpha$ -pyridinium), 2.51 (s, 3H,  $\text{CH}_3$   $\gamma$ -pyridinium), 1.76 (m, 4H, N- and C $\alpha$ - $\text{CH}_2\text{CH}_2$ ), 1.47 (m, 4H, N- and C $\alpha$ - $\text{CH}_2\text{CH}_2\text{CH}_2$ ), 1.25 (m, 32H, 16  $\text{CH}_2$  from n-alkyl chains), 0.87 (t,  $J = 6.8\text{ Hz}$ , 6H, 2  $\text{CH}_3$  from n-alkyl chains);  $^{13}\text{C-NMR}$  ( $\text{CDCl}_3$ ),  $\delta$ , ppm: 157.8 (C-4 pyridinium), 157.2 (C-2 pyridinium), 153.9 (C-6 pyridinium), 128.9

(C-5 pyridinium), 127.2 (C-3 pyridinium), 51.7 (N-CH<sub>2</sub>-), 33.0 (Cα-CH<sub>2</sub>-), 31.9, 29.6, 29.5 (2C), 29.4 (3C), 29.3 (5C), 29.1, 28.9, 28.7, 26.6, 22.6 (all from n-alkyl chains), 21.5 (CH<sub>3</sub> γ-pyridinium), 20.9 (CH<sub>3</sub> α-pyridinium), 14.1 (2 CH<sub>3</sub> from n-alkyl chains). Anal. (C<sub>31</sub>H<sub>58</sub>N<sup>+</sup> PF<sub>6</sub><sup>-</sup>), C, H, N.

**4,6-Dimethyl-1-decyl-2-tridecylpyridinium hexafluorophosphate 21:** T<sub>c</sub> = 58.4 °C; Yield 59%; <sup>1</sup>H-NMR (CDCl<sub>3</sub>), δ, ppm: 7.46 (d, *J* = 2.0 Hz, 1H, H-5 pyridinium), 7.40 (d, *J* = 2.0 Hz, 1H, H-3 pyridinium), 4.35 (t, *J* = 8.5 Hz, 2H, N-CH<sub>2</sub>), 2.93 (t, *J* = 8.0 Hz, 2H, Cα-CH<sub>2</sub>), 2.78 (s, 3H, CH<sub>3</sub> α-pyridinium), 2.51 (s, 3H, CH<sub>3</sub> γ-pyridinium), 1.76 (m, 4H, N- and Cα-CH<sub>2</sub>CH<sub>2</sub>), 1.47 (m, 4H, N- and Cα-CH<sub>2</sub>CH<sub>2</sub>CH<sub>2</sub>), 1.25 (m, 30H, 15 CH<sub>2</sub> from n-alkyl chains), 0.87 (t, *J* = 6.8 Hz, 6H, 2 CH<sub>3</sub> from n-alkyl chains); <sup>13</sup>C-NMR (CDCl<sub>3</sub>), δ, ppm: 157.8 (C-4 pyridinium), 157.2 (C-2 pyridinium), 153.4 (C-6 pyridinium), 128.9 (C-5 pyridinium), 127.2 (C-3 pyridinium), 51.7 (N-CH<sub>2</sub>-), 33.0 (Cα-CH<sub>2</sub>-), 31.9, 31.8, 29.6, 29.5, 29.4 (3C), 29.3 (3C), 29.2, 29.1, 28.9, 28.7 (2C), 26.6, 22.6 (all from n-alkyl chains), 21.5 (CH<sub>3</sub> γ-pyridinium), 20.9 (CH<sub>3</sub> α-pyridinium), 14.0 (2 CH<sub>3</sub> from n-alkyl chains). Anal. (C<sub>30</sub>H<sub>56</sub>N<sup>+</sup> PF<sub>6</sub><sup>-</sup>), C, H, N.

**4,6-Dimethyl-1-dodecyl-2-tridecylpyridinium hexafluorophosphate 22:** T<sub>c</sub> = 67.2 °C; Yield 62%; <sup>1</sup>H-NMR (CDCl<sub>3</sub>), δ, ppm: 7.47 (d, *J* = 2.2 Hz, 1H, H-5 pyridinium), 7.40 (d, *J* = 2.2 Hz, 1H, H-3 pyridinium), 4.35 (t, *J* = 8.5 Hz, 2H, N-CH<sub>2</sub>), 2.94 (t, *J* = 8.0 Hz, 2H, Cα-CH<sub>2</sub>), 2.79 (s, 3H, CH<sub>3</sub> α-pyridinium), 2.52 (s, 3H, CH<sub>3</sub> γ-pyridinium), 1.76 (m, 4H, N- and Cα-CH<sub>2</sub>CH<sub>2</sub>), 1.47 (m, 4H, N- and Cα-CH<sub>2</sub>CH<sub>2</sub>CH<sub>2</sub>), 1.25 (m, 34H, 17 CH<sub>2</sub> from n-alkyl chains), 0.87 (t, *J* = 6.8 Hz, 6H, 2 CH<sub>3</sub> from n-alkyl chains); <sup>13</sup>C-NMR (CDCl<sub>3</sub>), δ, ppm: 157.8 (C-4 pyridinium), 157.2 (C-2 pyridinium), 154.0 (C-6 pyridinium), 128.9 (C-5 pyridinium), 127.2 (C-3 pyridinium), 51.7 (N-CH<sub>2</sub>-), 33.0 (Cα-CH<sub>2</sub>-), 31.9, 31.8, 29.7, 29.6, 29.5 (2C), 29.4 (2C), 29.3 (4C), 29.1, 28.9, 28.6, 26.6, 22.6 (all from n-alkyl chains), 21.5 (CH<sub>3</sub> γ-pyridinium), 20.9 (CH<sub>3</sub> α-pyridinium), 14.1 (2 CH<sub>3</sub> from n-alkyl chains). Anal. (C<sub>32</sub>H<sub>60</sub>N<sup>+</sup> PF<sub>6</sub><sup>-</sup>), C, H, N.

**4,6-Dimethyl-1,2-ditetradecylpyridinium hexafluorophosphate 23:** T<sub>c</sub> = 68.5 °C; Yield 70%; <sup>1</sup>H-NMR (CDCl<sub>3</sub>), δ, ppm: 7.47 (d, *J* = 2.0 Hz, 1H, H-5 pyridinium), 7.40 (d, *J* = 2.0 Hz, 1H, H-3 pyridinium), 4.35 (t, *J* = 8.4 Hz, 2H, N-CH<sub>2</sub>), 2.94 (t, *J* = 8.0 Hz, 2H,

C $\alpha$ -CH<sub>2</sub>), 2.78 (s, 3H, CH<sub>3</sub>  $\alpha$ -pyridinium), 2.52 (s, 3H, CH<sub>3</sub>  $\gamma$ -pyridinium), 1.76 (m, 4H, N- and C $\alpha$ -CH<sub>2</sub>CH<sub>2</sub>), 1.47 (m, 4H, N- and C $\alpha$ -CH<sub>2</sub>CH<sub>2</sub>CH<sub>2</sub>), 1.25 (m, 40H, 20 CH<sub>2</sub> from n-alkyl chains), 0.88 (t,  $J$  = 6.8 Hz, 6H, 2 CH<sub>3</sub> from n-alkyl chains); <sup>13</sup>C-NMR (CDCl<sub>3</sub>),  $\delta$ , ppm: 157.8 (C-4 pyridinium), 157.2 (C-2 pyridinium), 154.0 (C-6 pyridinium), 128.9 (C-5 pyridinium), 127.2 (C-3 pyridinium), 51.7 (N-CH<sub>2</sub>-), 33.0 (C $\alpha$ -CH<sub>2</sub>-), 31.9, 29.6 (4C), 29.4 (5C), 29.3, 29.1, 28.9, 28.7, 26.6, 22.6 (all from n-alkyl chains), 21.5 (CH<sub>3</sub>  $\gamma$ -pyridinium), 20.9 (CH<sub>3</sub>  $\alpha$ -pyridinium), 14.1 (2 CH<sub>3</sub> from n-alkyl chains). Anal. (C<sub>35</sub>H<sub>66</sub>N<sup>+</sup> PF<sub>6</sub><sup>-</sup>), C, H, N.

**4,6-Dimethyl-1-tetradecyl-2-pentadecylpyridinium hexafluorophosphate 24:**  $T_c$  = 74.7 °C; Yield 61%; <sup>1</sup>H-NMR (CDCl<sub>3</sub>),  $\delta$ , ppm: 7.47 (d,  $J$  = 2.0 Hz, 1H, H-5 pyridinium), 7.40 (d,  $J$  = 2.0 Hz, 1H, H-3 pyridinium), 4.35 (t,  $J$  = 8.4 Hz, 2H, N-CH<sub>2</sub>), 2.94 (t,  $J$  = 8.0 Hz, 2H, C $\alpha$ -CH<sub>2</sub>), 2.78 (s, 3H, CH<sub>3</sub>  $\alpha$ -pyridinium), 2.52 (s, 3H, CH<sub>3</sub>  $\gamma$ -pyridinium), 1.76 (m, 4H, N- and C $\alpha$ -CH<sub>2</sub>CH<sub>2</sub>), 1.47 (m, 4H, N- and C $\alpha$ -CH<sub>2</sub>CH<sub>2</sub>CH<sub>2</sub>), 1.25 (m, 42H, 21 CH<sub>2</sub> from n-alkyl chains), 0.87 (t,  $J$  = 6.8 Hz, 6H, 2 CH<sub>3</sub> from n-alkyl chains); <sup>13</sup>C-NMR (CDCl<sub>3</sub>),  $\delta$ , ppm: 157.8 (C-4 pyridinium), 157.0 (C-2 pyridinium), 154.0 (C-6 pyridinium), 129.0 (C-5 pyridinium), 127.2 (C-3 pyridinium), 51.7 (N-CH<sub>2</sub>-), 33.0 (C $\alpha$ -CH<sub>2</sub>-), 31.9, 29.7, 29.6, 29.6 (2C), 29.4 (5C), 29.3, 29.1, 28.9, 28.7, 26.6, 22.6 (all from n-alkyl chains), 21.5 (CH<sub>3</sub>  $\gamma$ -pyridinium), 20.9 (CH<sub>3</sub>  $\alpha$ -pyridinium), 14.1 (2 CH<sub>3</sub> from n-alkyl chains). Anal. (C<sub>36</sub>H<sub>68</sub>N<sup>+</sup> PF<sub>6</sub><sup>-</sup>), C, H, N.

**4,6-Dimethyl-1-hexadecyl-2-pentadecylpyridinium hexafluorophosphate 25:**  $T_c$  = 74.1 °C; Yield 63%; <sup>1</sup>H-NMR (CDCl<sub>3</sub>),  $\delta$ , ppm: 7.47 (d,  $J$  = 2.2 Hz, 1H, H-5 pyridinium), 7.40 (d,  $J$  = 2.2 Hz, 1H, H-3 pyridinium), 4.36 (t,  $J$  = 8.4 Hz, 2H, N-CH<sub>2</sub>), 2.94 (t,  $J$  = 8.0 Hz, 2H, C $\alpha$ -CH<sub>2</sub>), 2.79 (s, 3H, CH<sub>3</sub>  $\alpha$ -pyridinium), 2.52 (s, 3H, CH<sub>3</sub>  $\gamma$ -pyridinium), 1.76 (m, 4H, N- and C $\alpha$ -CH<sub>2</sub>CH<sub>2</sub>), 1.47 (m, 4H, N- and C $\alpha$ -CH<sub>2</sub>CH<sub>2</sub>CH<sub>2</sub>), 1.25 (m, 46H, 23 CH<sub>2</sub> from n-alkyl chains), 0.87 (t,  $J$  = 6.8 Hz, 6H, 2 CH<sub>3</sub> from n-alkyl chains); <sup>13</sup>C-NMR (CDCl<sub>3</sub>),  $\delta$ , ppm: 157.8 (C-4 pyridinium), 157.2 (C-2 pyridinium), 154.0 (C-6 pyridinium), 128.9 (C-5 pyridinium), 127.2 (C-3 pyridinium), 51.7 (N-CH<sub>2</sub>-), 33.0 (C $\alpha$ -CH<sub>2</sub>-), 31.9, 29.7, 29.6 (2C), 29.5, 29.4 (5C), 29.3, 29.1, 28.9, 28.6, 26.6, 22.6 (all from



n-alkyl chains), 21.5 (CH<sub>3</sub>  $\gamma$ -pyridinium), 20.9 (CH<sub>3</sub>  $\alpha$ -pyridinium), 14.1 (2 CH<sub>3</sub> from n-alkyl chains). Anal. (C<sub>38</sub>H<sub>72</sub>N<sup>+</sup> PF<sub>6</sub><sup>-</sup>), C, H, N.

**4,6-Dimethyl-1,2-dihexadecylpyridinium hexafluorophosphate 26:** T<sub>c</sub> = 76.2 °C; Yield 59%; <sup>1</sup>H-NMR (CDCl<sub>3</sub>),  $\delta$ , ppm: 7.47 (d, *J* = 2.0 Hz, 1H, H-5 pyridinium), 7.40 (d, *J* = 2.0 Hz, 1H, H-3 pyridinium), 4.35 (t, *J* = 8.4 Hz, 2H, N-CH<sub>2</sub>), 2.94 (t, *J* = 8.0 Hz, 2H, C $\alpha$ -CH<sub>2</sub>), 2.79 (s, 3H, CH<sub>3</sub>  $\alpha$ -pyridinium), 2.52 (s, 3H, CH<sub>3</sub>  $\gamma$ -pyridinium), 1.76 (m, 4H, N- and C $\alpha$ -CH<sub>2</sub>CH<sub>2</sub>), 1.47 (m, 4H, N- and C $\alpha$ -CH<sub>2</sub>CH<sub>2</sub>CH<sub>2</sub>), 1.25 (m, 48H, 24 CH<sub>2</sub> from n-alkyl chains), 0.87 (t, *J* = 6.8 Hz, 6H, 2 CH<sub>3</sub> from n-alkyl chains); <sup>13</sup>C-NMR (CDCl<sub>3</sub>),  $\delta$ , ppm: 157.8 (C-4 pyridinium), 157.2 (C-2 pyridinium), 154.0 (C-6 pyridinium), 128.9 (C-5 pyridinium), 127.2 (C-3 pyridinium), 51.7 (N-CH<sub>2</sub>-), 33.0 (C $\alpha$ -CH<sub>2</sub>-), 31.9, 29.7 (2C), 29.6 (2C), 29.5, 29.4 (2C), 29.3 (2C), 29.1, 28.9, 28.6, 26.6, 22.6 (all from n-alkyl chains), 21.5 (CH<sub>3</sub>  $\gamma$ -pyridinium), 20.9 (CH<sub>3</sub>  $\alpha$ -pyridinium), 14.1 (2 CH<sub>3</sub> from n-alkyl chains). Anal. (C<sub>39</sub>H<sub>74</sub>N<sup>+</sup> PF<sub>6</sub><sup>-</sup>), C, H, N.

**4,6-Dimethyl-1-hexadecyl-2-heptadecylpyridinium hexafluorophosphate 27:** T<sub>c</sub> = 82.2 °C; Yield 71%; <sup>1</sup>H-NMR (CDCl<sub>3</sub>),  $\delta$ , ppm: 7.47 (d, *J* = 2.1 Hz, 1H, H-5 pyridinium), 7.40 (d, *J* = 2.1 Hz, 1H, H-3 pyridinium), 4.36 (t, *J* = 8.4 Hz, 2H, N-CH<sub>2</sub>), 2.94 (t, *J* = 8.0 Hz, 2H, C $\alpha$ -CH<sub>2</sub>), 2.79 (s, 3H, CH<sub>3</sub>  $\alpha$ -pyridinium), 2.52 (s, 3H, CH<sub>3</sub>  $\gamma$ -pyridinium), 1.76 (m, 4H, N- and C $\alpha$ -CH<sub>2</sub>CH<sub>2</sub>), 1.47 (m, 4H, N- and C $\alpha$ -CH<sub>2</sub>CH<sub>2</sub>CH<sub>2</sub>), 1.25 (m, 50H, 25 CH<sub>2</sub> from n-alkyl chains), 0.88 (t, *J* = 6.8 Hz, 6H, 2 CH<sub>3</sub> from n-alkyl chains); <sup>13</sup>C-NMR (CDCl<sub>3</sub>),  $\delta$ , ppm: 157.8 (C-4 pyridinium), 157.2 (C-2 pyridinium), 154.0 (C-6 pyridinium), 128.9 (C-5 pyridinium), 127.2 (C-3 pyridinium), 51.7 (N-CH<sub>2</sub>-), 33.0 (C $\alpha$ -CH<sub>2</sub>-), 31.9, 29.7 (2C), 29.6 (3C), 29.4 (2C), 29.3 (2C), 29.1, 28.9, 28.6, 26.6, 22.6 (all from n-alkyl chains), 21.5 (CH<sub>3</sub>  $\gamma$ -pyridinium), 20.9 (CH<sub>3</sub>  $\alpha$ -pyridinium), 14.1 (2 CH<sub>3</sub> from n-alkyl chains). Anal. (C<sub>40</sub>H<sub>76</sub>N<sup>+</sup> PF<sub>6</sub><sup>-</sup>), C, H, N.

**4,6-Dimethyl-1-octadecyl-2-heptadecylpyridinium hexafluorophosphate 28:** T<sub>c</sub> = 82.1 °C; Yield 65%; <sup>1</sup>H-NMR (CDCl<sub>3</sub>),  $\delta$ , ppm: 7.47 (d, *J* = 2.1 Hz, 1H, H-5 pyridinium), 7.40 (d, *J* = 2.1 Hz, 1H, H-3 pyridinium), 4.35 (t, *J* = 8.4 Hz, 2H, N-CH<sub>2</sub>), 2.94 (t, *J* = 8.0 Hz, 2H, C $\alpha$ -CH<sub>2</sub>), 2.79 (s, 3H, CH<sub>3</sub>  $\alpha$ -pyridinium), 2.52 (s, 3H, CH<sub>3</sub>  $\gamma$ -pyridinium), 1.76 (m, 4H, N- and C $\alpha$ -CH<sub>2</sub>CH<sub>2</sub>), 1.47 (m, 4H, N- and C $\alpha$ -CH<sub>2</sub>CH<sub>2</sub>CH<sub>2</sub>), 1.25 (m, 54H, 27

CH<sub>2</sub> from n-alkyl chains), 0.88 (t,  $J = 6.8$  Hz, 6H, 2 CH<sub>3</sub> from n-alkyl chains); <sup>13</sup>C-NMR (CDCl<sub>3</sub>),  $\delta$ , ppm: 157.8 (C-4 pyridinium), 157.2 (C-2 pyridinium), 154.0 (C-6 pyridinium), 128.9 (C-5 pyridinium), 127.2 (C-3 pyridinium), 51.7 (N-CH<sub>2</sub>-), 33.0 (C $\alpha$ -CH<sub>2</sub>-), 31.9, 29.7 (2C), 29.6 (4C), 29.5 (2C), 29.4 (3C), 29.3 (4C), 29.1, 28.9, 28.7, 26.6, 22.6 (all from n-alkyl chains), 21.5 (CH<sub>3</sub>  $\gamma$ -pyridinium), 20.9 (CH<sub>3</sub>  $\alpha$ -pyridinium), 14.1 (2 CH<sub>3</sub> from n-alkyl chains). Anal. (C<sub>42</sub>H<sub>80</sub>N<sup>+</sup> PF<sub>6</sub><sup>-</sup>), C, H, N.

**1,2-Bis(4,6-dimethyl-2-tetradecylpyridinium-1-yl)ethane dihexafluorophosphate 29:**

T<sub>c</sub> = 178.2 °C; Yield 57%; <sup>1</sup>H-NMR (DMSO-d<sub>6</sub>),  $\delta$ , ppm: 7.83 (br. s, 2H, 2 H-5 pyridinium), 7.82 (br. s, 2H, 2 H-3 pyridinium), 5.02 (m,  $J = 1.7$  Hz, 4H, 2 N-CH<sub>2</sub>), 2.90 (t,  $J = 7.9$  Hz, 4H, 2 C $\alpha$ -CH<sub>2</sub>), 2.73 (d,  $J = 2.7$  Hz, 6H, 2 CH<sub>3</sub>  $\alpha$ -pyridinium), 2.55 (d,  $J = 2.7$  Hz, 6H, 2 CH<sub>3</sub>  $\gamma$ -pyridinium), 1.69 (m, 4H, 2 C $\alpha$ -CH<sub>2</sub>CH<sub>2</sub>), 1.26 (m, 44H, 22 CH<sub>2</sub> from n-alkyl chains), 0.85 (t,  $J = 6.6$  Hz, 6H, 2 CH<sub>3</sub> from n-alkyl chains); <sup>13</sup>C-NMR (DMSO-d<sub>6</sub>),  $\delta$ , ppm: 158.9 (2 C-4 pyridinium), 158.3 (2 C-2 pyridinium), 155.3 (2 C-6 pyridinium), 128.7 (2 C-5 pyridinium), 126.9 (2 C-3 pyridinium), 48.7 (2 N-CH<sub>2</sub>-), 32.5 (2 C $\alpha$ -CH<sub>2</sub>-), 31.3 (2C), 29.12 (6C), 29.1 (4C), 29.0 (2C), 28.8 (2C), 28.7 (2C), 28.6 (2C), 27.7 (2C), 22.0 (2C), 21.0 (2 CH<sub>3</sub>  $\gamma$ -pyridinium), 20.9 (2 CH<sub>3</sub>  $\alpha$ -pyridinium), 13.9 (2 CH<sub>3</sub> from n-alkyl chains). Anal. (C<sub>44</sub>H<sub>78</sub>N<sub>2</sub><sup>+</sup> 2PF<sub>6</sub><sup>-</sup>), C, H, N.

**1,3-Bis(4,6-dimethyl-2-tetradecylpyridinium-1-yl)propane dihexafluorophosphate 30:**

T<sub>c</sub> = 186.6 °C; Yield 53%; <sup>1</sup>H-NMR (CDCl<sub>3</sub>),  $\delta$ , ppm: 7.43 (d,  $J = 1.2$  Hz, 2H, 2 H-5 pyridinium), 7.35 (d,  $J = 1.2$  Hz, 2H, 2 H-3 pyridinium), 4.66 (t,  $J = 8.5$  Hz, 4H, 2 N-CH<sub>2</sub>), 2.97 (t,  $J = 7.9$  Hz, 4H, 2 C $\alpha$ -CH<sub>2</sub>), 2.81 (s, 6H, 2 CH<sub>3</sub>  $\alpha$ -pyridinium), 2.50 (s, 6H, 2 CH<sub>3</sub>  $\gamma$ -pyridinium), 2.31 (m, 2H, N-CH<sub>2</sub>CH<sub>2</sub>CH<sub>2</sub>-N), 1.75 (dt,  $J = 7.5, 8.0$  Hz, 4H, 2 C $\alpha$ -CH<sub>2</sub>CH<sub>2</sub>), 1.44 (m, 4H, 2 C $\alpha$ -CH<sub>2</sub>CH<sub>2</sub>CH<sub>2</sub>), 1.26 (m, 44H, 22 CH<sub>2</sub> from n-alkyl chains), 0.88 (t,  $J = 6.8$  Hz, 6H, 2 CH<sub>3</sub> from n-alkyl chains); <sup>13</sup>C-NMR (CDCl<sub>3</sub>),  $\delta$ , ppm: 158.3 (2 C-4 pyridinium), 157.8 (2 C-2 pyridinium), 154.6 (2 C-6 pyridinium), 128.9 (2 C-5 pyridinium), 127.0 (2 C-3 pyridinium), 47.6 (2 N-CH<sub>2</sub>-), 33.0 (2 C $\alpha$ -CH<sub>2</sub>-), 31.9 (2C), 29.7 (8C), 29.5 (2C), 29.4 (4C), 29.2 (4C), 28.5 (4C), 27.6 (N-CH<sub>2</sub>CH<sub>2</sub>CH<sub>2</sub>-N), 22.7 (2C), 21.6 (2 CH<sub>3</sub>  $\gamma$ -pyridinium), 21.1 (2 CH<sub>3</sub>  $\alpha$ -pyridinium), 14.1 (2 CH<sub>3</sub> from n-alkyl chains). Anal. (C<sub>45</sub>H<sub>80</sub>N<sub>2</sub><sup>+</sup> 2PF<sub>6</sub><sup>-</sup>), C, H, N.

**1,4-Bis(4,6-dimethyl-2-tetradecylpyridinium-1-yl)butane dihexafluorophosphate 31:**

$T_c = 185.6\text{ }^\circ\text{C}$ ; Yield 57%;  $^1\text{H-NMR}$  ( $\text{CDCl}_3$ ),  $\delta$ , ppm: 7.39 (s, 2H, 2 H-5 pyridinium), 7.42 (s, 2H, 2 H-3 pyridinium), 4.49 (br. s, 4H, 2 N- $\text{CH}_2$ ), 3.04 (t,  $J = 8.0\text{ Hz}$ , 4H, 2 C $\alpha$ - $\text{CH}_2$ ), 2.83 (s, 6H, 2  $\text{CH}_3$   $\alpha$ -pyridinium), 2.54 (s, 6H, 2  $\text{CH}_3$   $\gamma$ -pyridinium), 2.08 (m, 4H, 2 N- $\text{CH}_2\text{CH}_2$ ), 1.72 (cv,  $J = 8.0\text{ Hz}$ , 4H, 2 C $\alpha$ - $\text{CH}_2\text{CH}_2$ ), 1.44 (dt,  $J = 7.4, 8.0\text{ Hz}$ , 4H, 2 C $\alpha$ - $\text{CH}_2\text{CH}_2\text{CH}_2$ ), 1.24 (m, 44H, 22  $\text{CH}_2$  from n-alkyl chains), 0.87 (t,  $J = 6.8\text{ Hz}$ , 6H, 2  $\text{CH}_3$  from n-alkyl chains);  $^{13}\text{C-NMR}$  ( $\text{CDCl}_3$ ),  $\delta$ , ppm: 157.7 (2 C-4 pyridinium), 157.5 (2 C-2 pyridinium), 154.4 (2 C-6 pyridinium), 128.7 (2 C-5 pyridinium), 127.1 (2 C-3 pyridinium), 51.6 (2 N- $\text{CH}_2$ -), 33.1 (2 C $\alpha$ - $\text{CH}_2$ -), 31.9 (2C), 29.7 (4C), 29.65 (4C), 29.6 (2C), 29.4 (4C), 29.3 (2C), 29.2 (2C), 28.9 (2C), 28.8 (2C), 25.4 (2C), 22.6 (2C), 21.5 (2  $\text{CH}_3$   $\gamma$ -pyridinium), 21.0 (2  $\text{CH}_3$   $\alpha$ -pyridinium), 14.0 (2  $\text{CH}_3$  from n-alkyl chains). Anal. ( $\text{C}_{46}\text{H}_{82}\text{N}_2^+ 2\text{PF}_6^-$ ), C, H, N.

**1,5-Bis(4,6-dimethyl-2-tetradecylpyridinium-1-yl)pentane dihexafluorophosphate 32:**

$T_c = 137.8\text{ }^\circ\text{C}$ ; Yield 62%;  $^1\text{H-NMR}$  ( $\text{CDCl}_3$ ),  $\delta$ , ppm: 7.45 (d,  $J = 2.4\text{ Hz}$ , 2H, 2 H-5 pyridinium), 7.35 (d,  $J = 2.4\text{ Hz}$ , 2H, 2 H-3 pyridinium), 4.40 (t,  $J = 8.4\text{ Hz}$ , 4H, 2 N- $\text{CH}_2$ ), 3.00 (t,  $J = 8.0\text{ Hz}$ , 4H, 2 C $\alpha$ - $\text{CH}_2$ ), 2.79 (s, 6H, 2  $\text{CH}_3$   $\alpha$ -pyridinium), 2.49 (s, 6H, 2  $\text{CH}_3$   $\gamma$ -pyridinium), 1.88 (m, 4H, 2 N- $\text{CH}_2\text{CH}_2$ ), 1.71 (dt,  $J = 7.5, 8.0\text{ Hz}$ , 4H, 2 C $\alpha$ - $\text{CH}_2\text{CH}_2$ ), 1.60 (m, 2H, N- $\text{CH}_2\text{CH}_2\text{CH}_2$ ), 1.42 (m, 4H, 2 C $\alpha$ - $\text{CH}_2\text{CH}_2\text{CH}_2$ ), 1.26 (m, 44H, 22  $\text{CH}_2$  from n-alkyl chains), 0.85 (t,  $J = 6.8\text{ Hz}$ , 6H, 2  $\text{CH}_3$  from n-alkyl chains);  $^{13}\text{C-NMR}$  ( $\text{CDCl}_3$ ),  $\delta$ , ppm: 158.1 (2 C-2 pyridinium), 157.9 (2 C-4 pyridinium), 154.8 (2 C-6 pyridinium), 129.0 (2 C-5 pyridinium), 127.4 (2 C-3 pyridinium), 51.5 (2 N- $\text{CH}_2$ -), 33.1 (2 C $\alpha$ - $\text{CH}_2$ -), 32.1 (2C), 29.9 (8C), 29.6 (4C), 29.2 (4C), 29.0 (4C), 28.7 (2C), 28.5 (2 N- $\text{CH}_2\text{CH}_2\text{CH}_2$ -), 23.4 (N- $\text{CH}_2\text{CH}_2\text{CH}_2$ -), 22.9 (2C), 21.7 (2  $\text{CH}_3$   $\gamma$ -pyridinium), 21.2 (2  $\text{CH}_3$   $\alpha$ -pyridinium), 14.3 (2  $\text{CH}_3$  from n-alkyl chains). Anal. ( $\text{C}_{47}\text{H}_{84}\text{N}_2^+ 2\text{PF}_6^-$ ), C, H, N.

**1,6-Bis(4,6-dimethyl-2-tetradecylpyridinium-1-yl)hexane dihexafluorophosphate 33:**

$T_c = 189.9\text{ }^\circ\text{C}$ ; Yield 52%;  $^1\text{H-NMR}$  ( $\text{CDCl}_3$ ),  $\delta$ , ppm: 7.42 (d,  $J = 1.4\text{ Hz}$ , 2H, 2 H-5 pyridinium), 7.36 (d,  $J = 1.4\text{ Hz}$ , 2H, 2 H-3 pyridinium), 4.42 (t,  $J = 8.4\text{ Hz}$ , 4H, 2 N- $\text{CH}_2$ ), 3.00 (t,  $J = 7.9\text{ Hz}$ , 4H, 2 C $\alpha$ - $\text{CH}_2$ ), 2.82 (s, 6H, 2  $\text{CH}_3$   $\alpha$ -pyridinium), 2.53 (s, 6H,

2 CH<sub>3</sub> γ-pyridinium), 1.88 (m, 4H, 2 N-CH<sub>2</sub>CH<sub>2</sub>), 1.75 (dt, *J* = 7.4, 8.0 Hz, 4H, 2 Cα-CH<sub>2</sub>CH<sub>2</sub>), 1.64 (m, 4H, 2 N-CH<sub>2</sub>CH<sub>2</sub>CH<sub>2</sub>), 1.46 (dt, *J* = 7.5 Hz, 4H, 2 Cα-CH<sub>2</sub>CH<sub>2</sub>CH<sub>2</sub>), 1.26 (m, 44H, 22 CH<sub>2</sub> from n-alkyl chains), 0.89 (t, *J* = 6.8 Hz, 6H, 2 CH<sub>3</sub> from n-alkyl chains); <sup>13</sup>C-NMR (CDCl<sub>3</sub>), δ, ppm: 157.7 (2 C-2 pyridinium), 157.5 (2 C-4 pyridinium), 154.4 (2 C-6 pyridinium), 128.7 (2 C-5 pyridinium), 127.1 (2 C-3 pyridinium), 51.6 (2 N-CH<sub>2</sub>-), 33.1 (2 Cα-CH<sub>2</sub>-), 31.9 (2C), 29.7 (4C), 29.6 (6C), 29.4 (4C), 29.3 (2C), 29.2 (2C), 28.9 (2C), 28.8 (2C N-CH<sub>2</sub>CH<sub>2</sub>CH<sub>2</sub>-), 25.4 (2C N-CH<sub>2</sub>CH<sub>2</sub>CH<sub>2</sub>-), 22.6 (2C), 21.5 (2 CH<sub>3</sub> γ-pyridinium), 21.0 (2 CH<sub>3</sub> α-pyridinium), 14.0 (2 CH<sub>3</sub> from n-alkyl chains). Anal. (C<sub>48</sub>H<sub>86</sub>N<sub>2</sub><sup>+</sup> 2PF<sub>6</sub><sup>-</sup>), C, H, N.

**1,7-Bis(4,6-dimethyl-2-tetradecylpyridinium-1-yl)heptane dihexafluorophosphate**

**34:** T<sub>c</sub> = 83.6 °C; Yield 61%; <sup>1</sup>H-NMR (CDCl<sub>3</sub>), δ, ppm: 7.46 (d, *J* = 2.0 Hz, 2H, 2 H-5 pyridinium), 7.37 (d, *J* = 2.0 Hz, 2H, 2 H-3 pyridinium), 4.37 (t, *J* = 8.4 Hz, 4H, 2 N-CH<sub>2</sub>), 2.96 (t, *J* = 7.9 Hz, 4H, 2 Cα-CH<sub>2</sub>), 2.79 (s, 6H, 2 CH<sub>3</sub> α-pyridinium), 2.51 (s, 6H, 2 CH<sub>3</sub> γ-pyridinium), 1.80 (m, 4H, 2 N-CH<sub>2</sub>CH<sub>2</sub>), 1.73 (dt, *J* = 7.5, 7.9 Hz, 4H, 2 Cα-CH<sub>2</sub>CH<sub>2</sub>), 1.50 (m, 4H, 2 N-CH<sub>2</sub>CH<sub>2</sub>CH<sub>2</sub>), 1.44 (m, 4H, 2 Cα-CH<sub>2</sub>CH<sub>2</sub>CH<sub>2</sub>), 1.33 (m, 2H, N-CH<sub>2</sub>CH<sub>2</sub>CH<sub>2</sub>CH<sub>2</sub>), 1.26 (m, 44H, 22 CH<sub>2</sub> from n-alkyl chains), 0.87 (t, *J* = 6.8 Hz, 6H, 2 CH<sub>3</sub> from n-alkyl chains); <sup>13</sup>C-NMR (CDCl<sub>3</sub>), δ, ppm: 157.7 (2 C-4 pyridinium), 157.4 (2 C-2 pyridinium), 154.3 (2 C-6 pyridinium), 128.9 (2 C-5 pyridinium), 127.2 (2 C-3 pyridinium), 51.6 (2 N-CH<sub>2</sub>-), 33.0 (2 Cα-CH<sub>2</sub>-), 31.9 (2C), 29.7 (8C), 29.4 (4C), 29.3 (4C), 29.2 (4C), 29.0 (4C), 28.8 (2C N-CH<sub>2</sub>CH<sub>2</sub>CH<sub>2</sub>-), 27.8 (2C), 25.9, 22.7 (2C), 21.5 (2 CH<sub>3</sub> γ-pyridinium), 20.9 (2 CH<sub>3</sub> α-pyridinium), 14.1 (2 CH<sub>3</sub> from n-alkyl chains). Anal. (C<sub>49</sub>H<sub>88</sub>N<sub>2</sub><sup>+</sup> 2PF<sub>6</sub><sup>-</sup>), C, H, N.

**1,8-Bis(4,6-dimethyl-2-tetradecylpyridinium-1-yl)octane dihexafluorophosphate 35:**

T<sub>c</sub> = 68.8 °C; Yield 64%; <sup>1</sup>H-NMR (CDCl<sub>3</sub>), δ, ppm: 7.45 (d, *J* = 2.1 Hz, 2H, 2 H-5 pyridinium), 7.37 (d, *J* = 2.1 Hz, 2H, 2 H-3 pyridinium), 4.37 (t, *J* = 8.4 Hz, 4H, 2 N-CH<sub>2</sub>), 2.96 (t, *J* = 8.0 Hz, 4H, 2 Cα-CH<sub>2</sub>), 2.80 (s, 6H, 2 CH<sub>3</sub> α-pyridinium), 2.51 (s, 6H, 2 CH<sub>3</sub> γ-pyridinium), 1.79 (m, 4H, 2 N-CH<sub>2</sub>CH<sub>2</sub>), 1.74 (dt, *J* = 7.4, 8.0 Hz, 4H, 2 Cα-CH<sub>2</sub>CH<sub>2</sub>), 1.50 (m, 4H, 2 N-CH<sub>2</sub>CH<sub>2</sub>CH<sub>2</sub>), 1.43 (m, 4H, 2 Cα-CH<sub>2</sub>CH<sub>2</sub>CH<sub>2</sub>), 1.34 (m, 4H, 2 N-CH<sub>2</sub>CH<sub>2</sub>CH<sub>2</sub>CH<sub>2</sub>), 1.26 (m, 44H, 22 CH<sub>2</sub> from n-alkyl chains), 0.87 (t, *J* = 6.8

Hz, 6H, 2 CH<sub>3</sub> from n-alkyl chains); <sup>13</sup>C-NMR (CDCl<sub>3</sub>), δ, ppm: 157.7 (2 C-4 pyridinium), 157.3 (2 C-2 pyridinium), 154.3 (2 C-6 pyridinium), 128.9 (2 C-5 pyridinium), 127.2 (2 C-3 pyridinium), 51.7 (2 N-CH<sub>2</sub>-), 33.03 (2 Cα-CH<sub>2</sub>-), 31.9 (2C), 29.7 (10C), 29.4 (4C), 29.3 (4C), 29.2 (6C), 29.0 (2C), 28.8 (2C), 28.0 (2C N-CH<sub>2</sub>-CH<sub>2</sub>-), 25.9 (2C), 22.7 (2C), 21.5 (2 CH<sub>3</sub> γ-pyridinium), 21.0 (2 CH<sub>3</sub> α-pyridinium), 14.10 (2 CH<sub>3</sub> from n-alkyl chains). Anal. (C<sub>50</sub>H<sub>90</sub>N<sub>2</sub><sup>+</sup> 2PF<sub>6</sub><sup>-</sup>), C, H, N.

***t*-Butyl-N,N-bis(2-(4,6-dimethyl-2-tetradecylpyridinium-1-yl)ethylenyl) carbamate dihexafluorophosphate 40a:** T<sub>c</sub> = 139.9 °C; Yield 84%; <sup>1</sup>H-NMR (CDCl<sub>3</sub>), δ, ppm: 7.50 (d, *J* = 2.0 Hz, 1H, H-5 pyridinium), 7.45 (d, *J* = 2.0 Hz, 1H, H-5' pyridinium), 7.38 (d, *J* = 2.0 Hz, 1H, H-3 pyridinium), 7.35 (d, *J* = 2.0 Hz, 1H, H-3' pyridinium), 4.58 (t, *J* = 7.3 Hz, 4H, 2 N<sup>+</sup>-CH<sub>2</sub>), 3.72 (t, *J* = 6.9 Hz, 2H, BocN-CH<sub>2</sub>), 3.62 (t, *J* = 7.4 Hz, 2H, BocN-CH<sub>2</sub>'), 3.14 (t, *J* = 7.8 Hz, 2H, CαPy-CH<sub>2</sub>), 2.98 (t, *J* = 7.8 Hz, 2H, CαPy'-CH<sub>2</sub>), 2.81 (s, 3H, CH<sub>3</sub> α-pyridinium), 2.80 (s, 3H, CH<sub>3</sub> α-pyridinium'), 2.53 (s, 3H, CH<sub>3</sub> γ-pyridinium), 2.51 (s, 3H, CH<sub>3</sub> γ-pyridinium'), 1.70 (m, 4H, 2 Cα-CH<sub>2</sub>-CH<sub>2</sub>), 1.43 (m, 4H, 2 Cα-CH<sub>2</sub>-CH<sub>2</sub>-CH<sub>2</sub>), 1.37 (s, 9H, 3 CH<sub>3</sub> *t*-Bu), 1.26 (m, 44H, 22 CH<sub>2</sub> from n-alkyl chains), 0.87 (t, *J* = 6.7 Hz, 6H, 2 CH<sub>3</sub> from n-alkyl chains); <sup>13</sup>C-NMR (CDCl<sub>3</sub>), δ, ppm: 158.5 (C-4 pyridinium), 158.3 (C-4 pyridinium'), 157.8 (2 C-2 pyridinium), 154.9 (C-6 pyridinium), 154.9 (CO *t*-Bu), 154.8 (C-6 pyridinium'), 129.1 (C-5 pyridinium), 128.9 (C-5 pyridinium'), 127.3 (C-3 pyridinium), 127.2 (C-3 pyridinium), 82.4 (CH<sub>3</sub>)<sub>3</sub>C, Boc), 49.5 (N<sup>+</sup>-CH<sub>2</sub>), 48.4 (N<sup>+</sup>-CH<sub>2</sub>'), 46.5 (BocN-CH<sub>2</sub>), 46.4 (BocN-CH<sub>2</sub>'), 32.9 (2 CαPy-CH<sub>2</sub>-), 31.8 (2C), 29.6 (10C), 29.5 (2C), 29.4, 29.3 (2C), 29.1 (4C), 28.5, 28.0 (3C (CH<sub>3</sub>)<sub>3</sub>C, Boc), 22.6 (2C), 21.5 (broad, 2 CH<sub>3</sub> γ-pyridinium), 21.1 (CH<sub>3</sub> α-pyridinium), 21.0 (CH<sub>3</sub> α-pyridinium'), 14.0 (2 CH<sub>3</sub> from n-alkyl chains). Anal. (C<sub>51</sub>H<sub>91</sub>N<sub>3</sub>O<sub>2</sub><sup>+</sup> 2PF<sub>6</sub><sup>-</sup>), C, H, N.

***t*-Butyl-N,N-bis(3-(4,6-dimethyl-2-tetradecylpyridinium-1-yl)propylenyl) carbamate dihexafluorophosphate 40b:** T<sub>c</sub> = 134.4 °C; Yield 86%; <sup>1</sup>H-NMR (CDCl<sub>3</sub>), δ, ppm: 7.45 (s, 2H, 2 H-5 pyridinium), 7.36 (s, 2H, 2 H-3 pyridinium), 4.39 (t, *J* = 7.7 Hz, 4H, 2 N<sup>+</sup>-CH<sub>2</sub>), 3.46 (t, *J* = 6.6 Hz, 4H, 2 BocN-CH<sub>2</sub>), 2.99 (t, *J* = 6.0 Hz, 4H, 2 CαPy-CH<sub>2</sub>), 2.81 (s, 6H, 2 CH<sub>3</sub> α-pyridinium), 2.51 (s, 6H, 2 CH<sub>3</sub> γ-pyridinium), 2.07 (m, 4H, 2 N<sup>+</sup>-

CH<sub>2</sub>CH<sub>2</sub>), 1.70 (dt,  $J = 7.5, 8.0$  Hz, 4H, 2 C $\alpha$ -CH<sub>2</sub>CH<sub>2</sub>), 1.37 (s, 9H, 3 CH<sub>3</sub> *t*-Bu), 1.44 (m, 4H, 2 C $\alpha$ -CH<sub>2</sub>CH<sub>2</sub>CH<sub>2</sub>), 1.26 (m, 44H, 22 CH<sub>2</sub> from n-alkyl chains), 0.87 (t,  $J = 6.7$  Hz, 6H, 2 CH<sub>3</sub> from n-alkyl chains); <sup>13</sup>C-NMR (CDCl<sub>3</sub>),  $\delta$ , ppm: 157.8 (2 C-4 pyridinium), 157.7 (2 C-2 pyridinium), 155.4 (CO *t*-Bu), 154.5 (2 C-6 pyridinium), 128.9 (2 C-5 pyridinium), 127.1 (2 C-3 pyridinium), 80.5 ((CH<sub>3</sub>)<sub>3</sub>C, Boc), 49.3 (broad s., 2 N<sup>+</sup>-CH<sub>2</sub>), 45.2 (broad s., 2 BocN-CH<sub>2</sub>), 32.9 (2 C $\alpha$ Py-CH<sub>2</sub>-), 31.9 (2C), 29.6 (10C), 29.5 (2C), 29.4, 29.3 (4C), 29.1 (2C), 28.8 (2C), 28.3 (3C (CH<sub>3</sub>)<sub>3</sub>C, Boc), 22.6 (2C), 21.5 (2 CH<sub>3</sub>  $\gamma$ -pyridinium), 20.9 (2 CH<sub>3</sub>  $\alpha$ -pyridinium), 14.1 (2 CH<sub>3</sub> from n-alkyl chains). Anal. (C<sub>53</sub>H<sub>95</sub>N<sub>3</sub>O<sub>2</sub><sup>+</sup> 2PF<sub>6</sub><sup>-</sup>), C, H, N.

***t*-Butyl-N-(3-(4,6-dimethyl-2-tetradecylpyridinium-1-yl)propylenyl)-N-(4-(4,6-dimethyl-2-tetradecylpyridinium-1-yl)butylenyl) carbamate dihexafluorophosphate 40c**:  $T_c = 143.5$  °C; Yield 79%; <sup>1</sup>H-NMR (CDCl<sub>3</sub>),  $\delta$ , ppm: 7.47 (br. s, 2H, 2 H-5 pyridinium), 7.38 (br. s, 2H, 2 H-3 pyridinium), 4.39 (m, 4H, 2 N<sup>+</sup>-CH<sub>2</sub>), 3.39 (t,  $J = 6.7$  Hz, 2H, BocN-CH<sub>2</sub>CH<sub>2</sub>CH<sub>2</sub>N<sup>+</sup>), 3.28 (m, 2H, BocN-CH<sub>2</sub>CH<sub>2</sub>CH<sub>2</sub>CH<sub>2</sub>N<sup>+</sup>), 2.96 (t,  $J = 7.7$  Hz, 4H, 2 C $\alpha$ Py-CH<sub>2</sub>), 2.79 (br. s, 6H, 2 CH<sub>3</sub>  $\alpha$ -pyridinium), 2.50 (br. s, 6H, 2 CH<sub>3</sub>  $\gamma$ -pyridinium), 2.03 (m, 2H, N<sup>+</sup>-CH<sub>2</sub>CH<sub>2</sub>CH<sub>2</sub>N-Boc), 1.73 (m, 8H, 2 C $\alpha$ -CH<sub>2</sub>CH<sub>2</sub> + N<sup>+</sup>-CH<sub>2</sub>CH<sub>2</sub>CH<sub>2</sub>CH<sub>2</sub>N-Boc + N<sup>+</sup>-CH<sub>2</sub>CH<sub>2</sub>CH<sub>2</sub>CH<sub>2</sub>N-Boc), 1.44 (s, 9H, 3 CH<sub>3</sub> *t*-Bu), 1.43 (m, 4H, 2 C $\alpha$ -CH<sub>2</sub>CH<sub>2</sub>CH<sub>2</sub>), 1.26 (m, 44H, 22 CH<sub>2</sub> from n-alkyl chains), 0.86 (t,  $J = 6.7$  Hz, 6H, 2 CH<sub>3</sub> from n-alkyl chains); <sup>13</sup>C-NMR (CDCl<sub>3</sub>),  $\delta$ , ppm: 157.9 (C-4 pyridinium), 157.8 (C-4 pyridinium), 157.4 (C-2 pyridinium'), 155.4 (CO *t*-Bu), 154.3 (2 C-6 pyridinium), 128.9 (C-5 pyridinium), 128.8 (C-5 pyridinium'), 127.2 (C-3 pyridinium), 127.1 (C-3 pyridinium'), 80.1 ((CH<sub>3</sub>)<sub>3</sub>C, Boc), 51.3 (N<sup>+</sup>-CH<sub>2</sub>CH<sub>2</sub>CH<sub>2</sub>N-Boc), 49.3 (br. s, N<sup>+</sup>-CH<sub>2</sub>CH<sub>2</sub>CH<sub>2</sub>CH<sub>2</sub>N-Boc), 44.5 (br. s, 2 BocN-CH<sub>2</sub>), 32.9 (C $\alpha$ Py-CH<sub>2</sub>-), 32.8 (C $\alpha$ Py'-CH<sub>2</sub>-), 31.8 (2C), 29.6 (10C), 29.5 (2C), 29.4, 29.3 (2C), 29.2 (4C), 28.7 (2C), 28.3 (3C (CH<sub>3</sub>)<sub>3</sub>C, Boc), 26.5, 22.6 (2C), 21.4 (br. s, 2 CH<sub>3</sub>  $\gamma$ -pyridinium), 20.8 (br. s, 2 CH<sub>3</sub>  $\alpha$ -pyridinium), 14.0 (2 CH<sub>3</sub> from n-alkyl chains). Anal. (C<sub>54</sub>H<sub>97</sub>N<sub>3</sub>O<sub>2</sub><sup>+</sup> 2PF<sub>6</sub><sup>-</sup>), C, H, N.

**N,N'-di-*t*-Butyloxycarbonyl-N,N'-bis(3-(4,6-dimethyl-2-tetradecylpyridinium-1-yl)propyl)butanediamine dihexafluorophosphate 46**:  $T_c = 103.3$  °C; Yield 81%; <sup>1</sup>H-NMR (CDCl<sub>3</sub>),  $\delta$ , ppm: 7.45 (br. s, 2H, 2 H-5 pyridinium), 7.37 (br. s, 2H, 2 H-3

pyridinium), 4.42 (m, 4H, 2 N<sup>+</sup>-CH<sub>2</sub>), 3.39 (m, 4H, BocN-CH<sub>2</sub>CH<sub>2</sub>CH<sub>2</sub>N<sup>+</sup>), 3.23 (m, 4H, BocN-CH<sub>2</sub>CH<sub>2</sub>CH<sub>2</sub>CH<sub>2</sub>NBoc), 2.97 (t, *J* = 7.7 Hz, 4H, 2 CαPy-CH<sub>2</sub>), 2.80 (s, 6H, 2 CH<sub>3</sub> α-pyridinium), 2.51 (s, 6H, 2 CH<sub>3</sub> γ-pyridinium), 2.06 (m, 4H, N<sup>+</sup>-CH<sub>2</sub>CH<sub>2</sub>CH<sub>2</sub>N-Boc), 1.74 (m, 4H, 2 Cα-CH<sub>2</sub>CH<sub>2</sub>), 1.54 (m, 4H, BocN-CH<sub>2</sub>CH<sub>2</sub>CH<sub>2</sub>CH<sub>2</sub>NBoc), 1.44 (s, 9H, 3 CH<sub>3</sub> *t*-Bu), 1.43 (m, 4H, 2 Cα-CH<sub>2</sub>CH<sub>2</sub>CH<sub>2</sub>), 1.25 (m, 44H, 22 CH<sub>2</sub> from n-alkyl chains), 0.87 (t, *J* = 6.7 Hz, 6H, 2 CH<sub>3</sub> from n-alkyl chains); <sup>13</sup>C-NMR (CDCl<sub>3</sub>), δ, ppm: 157.9 (br. s, 2 C-4 pyridinium), 157.5 (br. s, 2 C-2 pyridinium), 156.1 (2 CO *t*-Bu), 154.8 (2 C-6 pyridinium), 129.2 (2 C-5 pyridinium), 127.5 (2 C-3 pyridinium), 80.2 (2 (CH<sub>3</sub>)<sub>3</sub>C, Boc), 50.1 (br. s., 2 N<sup>+</sup>-CH<sub>2</sub>CH<sub>2</sub>CH<sub>2</sub>N-Boc), 48.9 (br. s., 2 N<sup>+</sup>-CH<sub>2</sub>CH<sub>2</sub>CH<sub>2</sub>N-Boc), 44.5 (br. s, BocN-CH<sub>2</sub>CH<sub>2</sub>CH<sub>2</sub>CH<sub>2</sub>NBoc), 33.3 (2 CαPy-CH<sub>2</sub>-), 32.2 (2C), 30.0 (8C), 29.9 (2C), 29.8 (2C), 29.7 (2C), 29.6 (4C), 29.2 (2C), 28.7 (6C 2 (CH<sub>3</sub>)<sub>3</sub>C, Boc), 26.4 (br. s, 2 N<sup>+</sup>-CH<sub>2</sub>CH<sub>2</sub>CH<sub>2</sub>N-Boc), 25.7 (br. s, BocN-CH<sub>2</sub>CH<sub>2</sub>CH<sub>2</sub>CH<sub>2</sub>NBoc), 23.00 (2C), 21.9 (2 CH<sub>3</sub> γ-pyridinium), 21.3 (2 CH<sub>3</sub> α-pyridinium), 14.4 (2 CH<sub>3</sub> from n-alkyl chains). Anal. (C<sub>62</sub>H<sub>112</sub>N<sub>4</sub>O<sub>4</sub><sup>+</sup> 2PF<sub>6</sub><sup>-</sup>), C, H, N.

**N,N-Bis(2-(4,6-dimethyl-2-tetradecylpyridinium-1-yl)ethylenyl)amine**

**dihexafluorophosphate 41a:** T<sub>c</sub> = 65.1 °C; Yield 49%; <sup>1</sup>H-NMR (CDCl<sub>3</sub>), δ, ppm: 7.47 (s, 2H, 2 H-5 pyridinium), 7.35 (s, 2H, 2 H-3 pyridinium), 4.80 (t, *J* = 7.1 Hz, 4H, 2 N<sup>+</sup>-CH<sub>2</sub>), 3.46 (br. s, 1H, NH), 3.26 (t, *J* = 7.1 Hz, 4H, 2 HN-CH<sub>2</sub>), 3.14 (t, *J* = 7.7 Hz, 4H, 2 CαPy-CH<sub>2</sub>), 3.02 (s, 6H, 2 CH<sub>3</sub> α-pyridinium), 2.50 (s, 6H, 2 CH<sub>3</sub> γ-pyridinium), 1.67 (cv, *J* = 7.7 Hz, 4H, 2 Cα-CH<sub>2</sub>CH<sub>2</sub>), 1.43 (cv, *J* = 7.6 Hz, 4H, 2 Cα-CH<sub>2</sub>CH<sub>2</sub>CH<sub>2</sub>), 1.26 (m, 44H, 22 CH<sub>2</sub> from n-alkyl chains), 0.83 (t, *J* = 6.7 Hz, 6H, 2 CH<sub>3</sub> from n-alkyl chains); <sup>13</sup>C-NMR (CDCl<sub>3</sub>), δ, ppm: 158.7 (2 C-2 pyridinium), 157.3 (2 C-4 pyridinium), 155.5 (2 C-6 pyridinium), 128.6 (2 C-5 pyridinium), 127.2 (2 C-3 pyridinium), 51.4 (2 N<sup>+</sup>-CH<sub>2</sub>), 47.7 (2 HN-CH<sub>2</sub>), 33.7 (2 CαPy-CH<sub>2</sub>-), 31.8 (2C), 29.6 (4C), 29.5 (6C), 29.3 (8C), 29.0 (2C), 22.6 (2 CH<sub>3</sub> γ-pyridinium), 22.5 (2C), 21.7 (2 CH<sub>3</sub> α-pyridinium), 14.0 (2 CH<sub>3</sub> from n-alkyl chains). Anal. (C<sub>46</sub>H<sub>83</sub>N<sub>3</sub><sup>+</sup> 2PF<sub>6</sub><sup>-</sup>), C, H, N.

**N,N-Bis(3-(4,6-dimethyl-2-tetradecylpyridinium-1-yl)propylenyl)amine**

**dihexafluorophosphate 41b:** T<sub>c</sub> = 45.4 °C; Yield 52%; <sup>1</sup>H-NMR (CDCl<sub>3</sub>), δ, ppm: 7.45 (s, 2H, 2 H-5 pyridinium), 7.36 (s, 2H, 2 H-3 pyridinium), 4.55 (t, *J* = 8.1 Hz, 4H, 2 N<sup>+</sup>-

CH<sub>2</sub>), 3.01 (t,  $J = 7.8$  Hz, 4H, 2 C $\alpha$ Py-CH<sub>2</sub>), 2.84 (s, 6H, 2 CH<sub>3</sub>  $\alpha$ -pyridinium), 2.78 (t,  $J = 6.1$  Hz, 4H, 2 BocN-CH<sub>2</sub>), 2.51 (s, 6H, 2 CH<sub>3</sub>  $\gamma$ -pyridinium), 1.96 (m, 4H, 2 N<sup>+</sup>-CH<sub>2</sub>CH<sub>2</sub>), 1.74 (cv,  $J = 8.0$  Hz, 4H, 2 C $\alpha$ -CH<sub>2</sub>CH<sub>2</sub>), 1.72 (s, 1H, NH), 1.43 (cv,  $J = 7.7$  Hz, 4H, 2 C $\alpha$ -CH<sub>2</sub>CH<sub>2</sub>CH<sub>2</sub>), 1.26 (m, 44H, 22 CH<sub>2</sub> from n-alkyl chains), 0.87 (t,  $J = 6.7$  Hz, 6H, 2 CH<sub>3</sub> from n-alkyl chains); <sup>13</sup>C-NMR (CDCl<sub>3</sub>),  $\delta$ , ppm: 157.7 (2 C-2 pyridinium), 157.5 (2 C-4 pyridinium), 154.7 (2 C-6 pyridinium), 128.7 (2 C-5 pyridinium), 127.0 (2 C-3 pyridinium), 50.5 (2 N<sup>+</sup>-CH<sub>2</sub>), 46.5 (2 HN-CH<sub>2</sub>), 32.9 (2 C $\alpha$ Py-CH<sub>2</sub>-), 31.9 (2C), 29.7 (2C), 29.6 (6C), 29.5 (2C), 29.4 (2C), 29.3 (4C), 29.2 (2C), 29.1 (2C), 28.7 (2C), 22.6 (2C), 21.5 (2 CH<sub>3</sub>  $\gamma$ -pyridinium), 20.9 (2 CH<sub>3</sub>  $\alpha$ -pyridinium), 14.0 (2 CH<sub>3</sub> from n-alkyl chains). Anal. (C<sub>48</sub>H<sub>87</sub>N<sub>3</sub><sup>+</sup> 2PF<sub>6</sub><sup>-</sup>), C, H, N.

**N-(3-(4,6-dimethyl-2-tetradecylpyridinium-1-yl)propylenyl)-N-(4-(4,6-dimethyl-2-tetradecylpyridinium-1-yl)butylenyl)amine dihexafluorophosphate 41c:**  $T_c = 67.2$  °C; Yield 47%; <sup>1</sup>H-NMR (CDCl<sub>3</sub>),  $\delta$ , ppm: 7.55 (s, 1H, H-5 pyridinium), 7.52 (s, 1H, H-5 pyridinium'), 7.32 (br. s, 2H, 2 H-3 pyridinium), 4.92 (t,  $J = 8.8$  Hz, 2H, N<sup>+</sup>-CH<sub>2</sub>CH<sub>2</sub>CH<sub>2</sub>NH), 4.61 (t,  $J = 7.7$  Hz, 2H, N<sup>+</sup>-CH<sub>2</sub>CH<sub>2</sub>CH<sub>2</sub>CH<sub>2</sub>NH), 3.33 (t,  $J = 6.7$  Hz, 2H, HN-CH<sub>2</sub>CH<sub>2</sub>CH<sub>2</sub>CH<sub>2</sub>N<sup>+</sup>), 3.16 (m,  $J = 6.8, 7.6$  Hz, 6H, HN-CH<sub>2</sub>CH<sub>2</sub>CH<sub>2</sub>CH<sub>2</sub>N<sup>+</sup> + 2 C $\alpha$ Py-CH<sub>2</sub>), 3.04 (s, 3H, CH<sub>3</sub>  $\alpha$ -pyridinium), 3.05 (s, 3H, CH<sub>3</sub>  $\alpha$ -pyridinium'), 2.53 (m, 2H, N<sup>+</sup>-CH<sub>2</sub>CH<sub>2</sub>CH<sub>2</sub>NH), 2.49 (br. s, 6H, 2 CH<sub>3</sub>  $\gamma$ -pyridinium), 2.14 (m, 4H, N<sup>+</sup>-CH<sub>2</sub>CH<sub>2</sub>CH<sub>2</sub>CH<sub>2</sub>NH + N<sup>+</sup>-CH<sub>2</sub>CH<sub>2</sub>CH<sub>2</sub>CH<sub>2</sub>NH), 1.70 (cv,  $J = 7.8$  Hz, 8H, 2 C $\alpha$ -CH<sub>2</sub>CH<sub>2</sub>), 1.43 (m, 4H, 2 C $\alpha$ -CH<sub>2</sub>CH<sub>2</sub>CH<sub>2</sub>), 1.24 (m, 44H, 22 CH<sub>2</sub> from n-alkyl chains), 0.82 (t,  $J = 6.7$  Hz, 6H, 2 CH<sub>3</sub> from n-alkyl chains); <sup>13</sup>C-NMR (CDCl<sub>3</sub>),  $\delta$ , ppm: 158.3 (C-2 pyridinium), 157.7 (C-2 pyridinium'), 157.4 (C-4 pyridinium), 157.3 (C-4 pyridinium'), 155.5 (C-6 pyridinium), 155.3 (C-6 pyridinium'), 128.9 (C-5 pyridinium), 128.7 (C-5 pyridinium'), 126.7 (2 C-3 pyridinium), 57.9 (N<sup>+</sup>-CH<sub>2</sub>CH<sub>2</sub>CH<sub>2</sub>CH<sub>2</sub>NH), 51.7 (N<sup>+</sup>-CH<sub>2</sub>CH<sub>2</sub>CH<sub>2</sub>CH<sub>2</sub>NH), 50.1 (HN-CH<sub>2</sub>CH<sub>2</sub>CH<sub>2</sub>CH<sub>2</sub>N<sup>+</sup>), 47.3 (HN-CH<sub>2</sub>CH<sub>2</sub>CH<sub>2</sub>N<sup>+</sup>), 45.1 (HN-CH<sub>2</sub>CH<sub>2</sub>), 33.2 (2 C $\alpha$ Py-CH<sub>2</sub>-), 31.8 (2C), 29.5 (10C), 29.3 (8C), 28.9 (2C), 26.6 (2C), 26.0, 23.2 (2C), 22.5 (2C), 22.4 (CH<sub>3</sub>  $\gamma$ -pyridinium), 22.3 (CH<sub>3</sub>  $\gamma$ -pyridinium'), 21.7 (br. s, 2 CH<sub>3</sub>  $\alpha$ -pyridinium), 14.0 (2 CH<sub>3</sub> from n-alkyl chains). Anal. (C<sub>49</sub>H<sub>89</sub>N<sub>3</sub><sup>+</sup> 2PF<sub>6</sub><sup>-</sup>), C, H, N.



**N,N'-Bis(3-(4,6-dimethyl-2-tetradecylpyridinium-1-yl)propyl)butanediamine**

**dihexafluorophosphate 47:** amorphous; glass transition at 9.6 °C; Yield 45%; <sup>1</sup>H-NMR (CDCl<sub>3</sub>), δ, ppm: 7.46 (s, 2H, 2 H-5 pyridinium), 7.37 (s, 2H, 2 H-3 pyridinium), 4.42 (t, 4H, *J* = 8.0 Hz, 2 N<sup>+</sup>-CH<sub>2</sub>), 3.01 (t, *J* = 7.8 Hz, 4H, 2 CαPy-CH<sub>2</sub>), 2.82 (s, 6H, 2 CH<sub>3</sub> α-pyridinium), 2.78 (t, 4H, *J* = 6.4 Hz, 2 HN-CH<sub>2</sub>CH<sub>2</sub>CH<sub>2</sub>N<sup>+</sup>), 2.65 (m, 4H, HN-CH<sub>2</sub>CH<sub>2</sub>CH<sub>2</sub>CH<sub>2</sub>NH), 2.51 (s, 6H, 2 CH<sub>3</sub> γ-pyridinium), 1.95 (m, 4H, N<sup>+</sup>-CH<sub>2</sub>CH<sub>2</sub>CH<sub>2</sub>NH), 1.73 (cv, *J* = 7.7 Hz, 4H, 2 Cα-CH<sub>2</sub>CH<sub>2</sub>), 1.56 (m, 4H, HN-CH<sub>2</sub>CH<sub>2</sub>CH<sub>2</sub>CH<sub>2</sub>NH), 1.44 (cv, *J* = 7.3 Hz, 4H, 2 Cα-CH<sub>2</sub>CH<sub>2</sub>CH<sub>2</sub>), 1.25 (m, 44H, 22 CH<sub>2</sub> from n-alkyl chains), 0.87 (t, *J* = 6.7 Hz, 6H, 2 CH<sub>3</sub> from n-alkyl chains); <sup>13</sup>C-NMR (CDCl<sub>3</sub>), δ, ppm: 157.9 (2 C-4 pyridinium), 157.8 (2 C-2 pyridinium), 154.7 (2 C-6 pyridinium), 129.2 (2 C-5 pyridinium), 127.5 (2 C-3 pyridinium), 50.4 (2 N<sup>+</sup>-CH<sub>2</sub>CH<sub>2</sub>CH<sub>2</sub>NH), 49.5 (2 N<sup>+</sup>-CH<sub>2</sub>CH<sub>2</sub>CH<sub>2</sub>N-Boc), 45.8 (HN-CH<sub>2</sub>CH<sub>2</sub>CH<sub>2</sub>CH<sub>2</sub>NH), 33.3 (2 CαPy-CH<sub>2</sub>-), 32.5 (2C), 30.0 (8C), 29.9 (2C), 29.8 (2C), 29.7 (2C), 29.6 (2C), 29.5 (2C), 29.2 (2C), 27.8 (2 N<sup>+</sup>-CH<sub>2</sub>CH<sub>2</sub>CH<sub>2</sub>NH), 23.0 (2C), 21.9 (2 CH<sub>3</sub> γ-pyridinium), 21.3 (2 CH<sub>3</sub> α-pyridinium), 14.4 (2 CH<sub>3</sub> from n-alkyl chains). Anal. (C<sub>52</sub>H<sub>96</sub>N<sub>4</sub><sup>+</sup> 2PF<sub>6</sub><sup>-</sup>), C, H, N.

**N,N'-Bis(3-(4,6-dimethyl-2-tetradecylpyridinium-1-yl)propyl)butane-N,N'-**

**bismyristoylamide dihexafluorophosphate 48a:** T<sub>c</sub> = 125.8 °C; Yield 55%; <sup>1</sup>H-NMR (CDCl<sub>3</sub>), δ, ppm: 7.39 (br. s, 2H, 2 H-5 pyridinium), 7.32 (br. s, 2H, 2 H-3 pyridinium), 4.48 (m, 4H, 2 N<sup>+</sup>-CH<sub>2</sub>), 3.57 (t, 4H, *J* = 6.6 Hz, MyristoylN-CH<sub>2</sub>CH<sub>2</sub>CH<sub>2</sub>N<sup>+</sup>), 3.39 (m, 4H, MyristoylN-CH<sub>2</sub>CH<sub>2</sub>CH<sub>2</sub>CH<sub>2</sub>NMyristoyl), 3.02 (t, *J* = 7.7 Hz, 4H, 2 CαPy-CH<sub>2</sub>), 2.85 (s, 6H, 2 CH<sub>3</sub> α-pyridinium), 2.53 (s, 6H, 2 CH<sub>3</sub> γ-pyridinium), 2.33 (t, *J* = 7.7 Hz, 4H, 2 NCOCH<sub>2</sub>), 2.12 (m, 4H, N<sup>+</sup>-CH<sub>2</sub>CH<sub>2</sub>CH<sub>2</sub>NMyristoyl), 1.74 (cv, *J* = 7.7 Hz, 4H, 2 Cα-CH<sub>2</sub>CH<sub>2</sub>), 1.62 (m, 8H, 2 NCOCH<sub>2</sub>CH<sub>2</sub>+ MyristoylN-CH<sub>2</sub>CH<sub>2</sub>CH<sub>2</sub>CH<sub>2</sub>NMyristoyl), 1.45 (m, 4H, 2 Cα-CH<sub>2</sub>CH<sub>2</sub>CH<sub>2</sub>), 1.25 (m, 84H, 42 CH<sub>2</sub> from n-alkyl chains), 0.88 (t, *J* = 6.8 Hz, 12H, 4 CH<sub>3</sub> from n-alkyl chains); <sup>13</sup>C-NMR (CDCl<sub>3</sub>), δ, ppm: 174.1 (2 CO Myristoyl), 158.4 (2 C-4 pyridinium), 157.5 (2 C-2 pyridinium), 155.4 (2 C-6 pyridinium), 128.9 (2 C-5 pyridinium), 127.2 (2 C-3 pyridinium), 50.2 (br. s, 2 N<sup>+</sup>-CH<sub>2</sub>CH<sub>2</sub>CH<sub>2</sub>NMyristoyl), 49.2 (br. s, 2 N<sup>+</sup>-CH<sub>2</sub>CH<sub>2</sub>CH<sub>2</sub>NMyristoyl), 44.1 (br. s, MyristoylN-CH<sub>2</sub>CH<sub>2</sub>CH<sub>2</sub>CH<sub>2</sub>NMyristoyl), 33.2 (2 CαPy-CH<sub>2</sub>-), 32.3 (4C), 30.1 (12C),

30.0 (8C), 29.9 (4C), 29.8 (4C), 29.7 (2C), 29.4 (4C), 29.1 (2C), 25.7 (2C), 23.0 (4C), 22.0 (2 CH<sub>3</sub> γ-pyridinium), 21.5 (2 CH<sub>3</sub> α-pyridinium), 14.5 (4 CH<sub>3</sub> from n-alkyl chains). Anal. (C<sub>80</sub>H<sub>148</sub>N<sub>4</sub><sup>+</sup> 2PF<sub>6</sub><sup>-</sup>), C, H, N.

**N,N'-Bis(3-(4,6-dimethyl-2-tetradecylpyridinium-1-yl)propylenyl)butane-N,N'-**

**bispamitoylamide dihexafluorophosphate 48b:** T<sub>c</sub> = 124.9 °C; Yield 62%; <sup>1</sup>H-NMR (CDCl<sub>3</sub>), δ, ppm: 7.41 (br. s, 2H, 2 H-5 pyridinium), 7.33 (br. s, 2H, 2 H-3 pyridinium), 4.47 (m, 4H, 2 N<sup>+</sup>-CH<sub>2</sub>), 3.55 (t, 4H, J = 6.6 Hz, PalmitoylN-CH<sub>2</sub>CH<sub>2</sub>CH<sub>2</sub>N<sup>+</sup>), 3.38 (m, 4H, PalmitoylN-CH<sub>2</sub>CH<sub>2</sub>CH<sub>2</sub>CH<sub>2</sub>NPalmitoyl), 3.00 (t, J = 7.7 Hz, 4H, 2 CαPy-CH<sub>2</sub>), 2.84 (s, 6H, 2 CH<sub>3</sub> α-pyridinium), 2.51 (s, 6H, 2 CH<sub>3</sub> γ-pyridinium), 2.32 (t, J = 7.3 Hz, 4H, 2 NCOCH<sub>2</sub>), 2.11 (m, 4H, N<sup>+</sup>-CH<sub>2</sub>CH<sub>2</sub>CH<sub>2</sub>NPalmitoyl), 1.74 (m, 4H, 2 Cα-CH<sub>2</sub>CH<sub>2</sub>), 1.62 (m, 8H, 2 NCOCH<sub>2</sub>CH<sub>2</sub>+ PalmitoylN-CH<sub>2</sub>CH<sub>2</sub>CH<sub>2</sub>CH<sub>2</sub>NPalmitoyl), 1.44 (m, 4H, 2 Cα-CH<sub>2</sub>CH<sub>2</sub>CH<sub>2</sub>), 1.25 (m, 96H, 48 CH<sub>2</sub> from n-alkyl chains), 0.88 (t, J = 6.8 Hz, 12H, 4 CH<sub>3</sub> from n-alkyl chains); <sup>13</sup>C-NMR (CDCl<sub>3</sub>), δ, ppm: 174.1 (2 CO Palmitoyl), 158.2 (2 C-4 pyridinium), 157.7 (2 C-2 pyridinium), 155.2 (2 C-6 pyridinium), 127.2 (2 C-3 pyridinium), 120.0 (2 C-5 pyridinium), 50.2 (br. s, 2 N<sup>+</sup>-CH<sub>2</sub>CH<sub>2</sub>CH<sub>2</sub>NPalmitoyl), 49.2 (br. s, 2 N<sup>+</sup>-CH<sub>2</sub>CH<sub>2</sub>CH<sub>2</sub>NPalmitoyl), 44.1 (br. s, PalmitoylN-CH<sub>2</sub>CH<sub>2</sub>CH<sub>2</sub>CH<sub>2</sub>NPalmitoyl), 33.4 (2 CαPy-CH<sub>2</sub>-), 33.1 (2 NCOCH<sub>2</sub>), 32.3 (4C), 30.0 (18C), 29.9 (8C), 29.8 (2C), 29.7 (4C), 29.6 (2C), 29.5 (2C), 29.4 (2C), 29.1 (2C), 28.2 (2C), 26.6 (2C), 25.7 (2C), 23.0 (4C), 21.9 (2 CH<sub>3</sub> γ-pyridinium), 21.4 (2 CH<sub>3</sub> α-pyridinium), 14.4 (4 CH<sub>3</sub> from n-alkyl chains). Anal. (C<sub>84</sub>H<sub>156</sub>N<sub>4</sub><sup>+</sup> 2PF<sub>6</sub><sup>-</sup>), C, H, N.

**N,N'-Bis(3-(4,6-dimethyl-2-tetradecylpyridinium-1-yl)propylenyl)butane-N,N'-**

**bispalmitylamine dihexafluorophosphate 49:** T<sub>c</sub> = 69.4 °C; Yield 65%; 7.43 (br. s, 2H, 2 H-5 pyridinium), 7.37 (br. s, 2H, 2 H-3 pyridinium), 4.46 (t, 4H, J = 7.8 Hz, 2 N<sup>+</sup>-CH<sub>2</sub>), 3.01 (t, J = 7.8 Hz, 4H, 2 CαPy-CH<sub>2</sub>), 2.81 (s, 6H, 2 CH<sub>3</sub> α-pyridinium), 2.56 (m, 4H, 2 PalmitylN-CH<sub>2</sub>CH<sub>2</sub>CH<sub>2</sub>N<sup>+</sup>), 2.50 (s, 6H, 2 CH<sub>3</sub> γ-pyridinium), 2.46 (m, 4H, HN-CH<sub>2</sub>CH<sub>2</sub>CH<sub>2</sub>CH<sub>2</sub>NPalmityl), 2.40 (t, J = 7.7 Hz, 4H, N-CH<sub>2</sub> from Palmityl), 1.86 (m, 4H, N<sup>+</sup>-CH<sub>2</sub>CH<sub>2</sub>CH<sub>2</sub>NPalmityl), 1.74 (m, 4H, 2 Cα-CH<sub>2</sub>CH<sub>2</sub>), 1.44 (m, 12H, 2 Cα-CH<sub>2</sub>CH<sub>2</sub>CH<sub>2</sub> + PalmitylN-CH<sub>2</sub>CH<sub>2</sub>CH<sub>2</sub>CH<sub>2</sub>NPalmityl), 1.26 (m, 96H, 48 CH<sub>2</sub> from n-alkyl chains), 0.88 (t, J = 6.7 Hz, 12H, 4 CH<sub>3</sub> from n-alkyl chains); <sup>13</sup>C-NMR (CDCl<sub>3</sub>), δ,

ppm: 157.9 (2 C-4 pyridinium), 157.8 (2 C-2 pyridinium), 154.7 (2 C-6 pyridinium), 129.1 (2 C-5 pyridinium), 127.5 (2 C-3 pyridinium), 54.9 (2 N<sup>+</sup>-CH<sub>2</sub>CH<sub>2</sub>CH<sub>2</sub>NPalmityl), 54.5 (2 N<sup>+</sup>-CH<sub>2</sub>CH<sub>2</sub>CH<sub>2</sub>NPalmityl), 51.1 (PamitylN-CH<sub>2</sub>CH<sub>2</sub>CH<sub>2</sub>CH<sub>2</sub>NPalmityl), 50.9 (2C N-CH<sub>2</sub> from Palmityl), 33.2 (2 CαPy-CH<sub>2</sub>-), 32.3 (2C), 30.0 (24C), 29.9 (4C), 29.7 (6C), 29.6 (2C), 29.2 (4C), 28.3 (2C), 28.0 (4C), 27.6 (2 N<sup>+</sup>-CH<sub>2</sub>CH<sub>2</sub>CH<sub>2</sub>NH), 25.5 (2C), 23.0 (4C), 21.9 (2 CH<sub>3</sub> γ-pyridinium), 21.3 (2 CH<sub>3</sub> α-pyridinium), 14.4 (2 CH<sub>3</sub> from n-alkyl chains). Anal. (C<sub>84</sub>H<sub>160</sub>N<sub>4</sub><sup>+</sup> 2PF<sub>6</sub><sup>-</sup>), C, H, N.

**Tris(2-(4,6-dimethyl-2-tetradecylpyridinium-1-yl)ethyl)amine**

**tris(2-(4,6-dimethyl-2-tetradecylpyridinium-1-yl)ethyl)amine hexafluorophosphate 50:** T<sub>c</sub> = 121.2 °C; Yield 57%; 7.42 (s, 3H, 3 H-5 pyridinium), 7.38 (s, 3H, 3 H-3 pyridinium), 4.57 (t, *J* = 7.0 Hz, 4H, 2 N<sup>+</sup>-CH<sub>2</sub>), 3.01 (m, 6H, 3 N-CH<sub>2</sub>), 2.99 (t, *J* = 7.8 Hz, 6H, 3 CαPy-CH<sub>2</sub>), 2.77 (s, 9H, 3 CH<sub>3</sub> α-pyridinium), 2.51 (s, 9H, 3 CH<sub>3</sub> γ-pyridinium), 1.76 (cv, *J* = 7.5 Hz, 6H, 3 Cα-CH<sub>2</sub>CH<sub>2</sub>), 1.43 (m, 6H, 3 Cα-CH<sub>2</sub>CH<sub>2</sub>CH<sub>2</sub>), 1.26 (m, 66H, 33 CH<sub>2</sub> from n-alkyl chains), 0.88 (t, *J* = 6.7 Hz, 9H, 3 CH<sub>3</sub> from n-alkyl chains); <sup>13</sup>C-NMR (CDCl<sub>3</sub>), δ, ppm: 158.8 (3 C-4 pyridinium), 158.0 (3 C-2 pyridinium), 154.7 (3 C-6 pyridinium), 129.2 (3 C-5 pyridinium), 127.9 (3 C-3 pyridinium), 52.2 (3 N<sup>+</sup>-CH<sub>2</sub>), 50.3 (3 N-CH<sub>2</sub>), 33.7 (3 CαPy-CH<sub>2</sub>-), 32.3 (3C), 30.1 (12C), 30.0 (3C), 29.9 (6C), 29.7 (3C), 29.6 (3C), 28.7 (3C), 23.0 (3 CH<sub>3</sub> γ-pyridinium), 22.0 (3C), 21.5 (3 CH<sub>3</sub> α-pyridinium), 14.4 (3 CH<sub>3</sub> from n-alkyl chains). Anal. (C<sub>69</sub>H<sub>123</sub>N<sub>4</sub><sup>+</sup> 3PF<sub>6</sub><sup>-</sup>), C, H, N.

**4,6-Dimethyl-2-tetradecyl-1-(2-hydroxyethyl)pyridinium hexafluorophosphate 51:**

mp = 55.6 °C; <sup>1</sup>H-NMR (CDCl<sub>3</sub>), δ, ppm: 7.44 (s, 1H, H-5 pyridinium), 7.37 (s, 1H, H-3 pyridinium), 4.60 (t, *J* = 5.4 Hz, 2H, N<sup>+</sup>-CH<sub>2</sub>), 4.03 (m, 2H, HO-CH<sub>2</sub>), 3.09 (br.s, 1H, 2 HO-CH<sub>2</sub>), 3.05 (t, *J* = 8.0 Hz, 2H, CαPy-CH<sub>2</sub>), 2.81 (s, 3H, CH<sub>3</sub> α-pyridinium), 2.52 (s, 3H, CH<sub>3</sub> γ-pyridinium), 1.70 (cv, *J* = 8.0 Hz, 2H, Cα-CH<sub>2</sub>CH<sub>2</sub>), 1.43 (cv, *J* = 7.5 Hz, 2H, Cα-CH<sub>2</sub>CH<sub>2</sub>CH<sub>2</sub>), 1.25 (m, 22H, 11 CH<sub>2</sub> from n-alkyl chain), 0.87 (t, *J* = 6.6 Hz, 3H, CH<sub>3</sub> from n-alkyl chain); <sup>13</sup>C-NMR (CDCl<sub>3</sub>), δ, ppm: 158.5 (C-2 pyridinium), 157.9 (C-4 pyridinium), 155.1 (C-6 pyridinium), 128.6 (C-5 pyridinium), 127.1 (C-3 pyridinium), 60.2 (HO-CH<sub>2</sub>), 53.0 (N<sup>+</sup>-CH<sub>2</sub>), 33.5 (CαPy-CH<sub>2</sub>-), 31.9, 29.6 (2C), 29.5,

29.4, 29.3, 29.2, 29.1, 28.5, 28.4, 22.6, 21.9 (CH<sub>3</sub> γ-pyridinium), 21.4 (CH<sub>3</sub> α-pyridinium), 14.06 (CH<sub>3</sub> from n-alkyl chain). Anal. (C<sub>23</sub>H<sub>42</sub>NO<sup>+</sup> PF<sub>6</sub><sup>-</sup>), C, H, N.

#### **4,6-Dimethyl-2-tetradecyl-1-(2-dodecanoyloxyethyl)pyridinium**

**hexafluorophosphate 52a:** T<sub>c</sub> = 61.3 °C; Yield 87%; <sup>1</sup>H-NMR (CDCl<sub>3</sub>), δ, ppm: 7.48 (s, 1H, H-5 pyridinium), 7.40 (s, 1H, H-3 pyridinium), 4.77 (t, *J* = 6.0 Hz, 2H, N<sup>+</sup>-CH<sub>2</sub>), 4.47 (t, *J* = 6.0 Hz, 2H, COO-CH<sub>2</sub>), 3.04 (t, *J* = 8.1 Hz, 2H, CαPy-CH<sub>2</sub>), 2.85 (s, 3H, CH<sub>3</sub> α-pyridinium), 2.54 (s, 3H, CH<sub>3</sub> γ-pyridinium), 2.24 (t, *J* = 7.6 Hz, 2H, O-CO-CH<sub>2</sub>), 1.77 (cv, *J* = 7.9 Hz, 2H, Cα-CH<sub>2</sub>CH<sub>2</sub>), 1.51 (cv, *J* = 7.6 Hz, O-CO-CH<sub>2</sub>CH<sub>2</sub>), 1.47 (cv, *J* = 7.8 Hz, 2H, Cα-CH<sub>2</sub>CH<sub>2</sub>CH<sub>2</sub>), 1.36 (m, 2H, O-CO-CH<sub>2</sub>CH<sub>2</sub>CH<sub>2</sub>), 1.25 (m, 34H, 17 CH<sub>2</sub> from n-alkyl chains), 0.88 (t, *J* = 6.8 Hz, 6H, 2 CH<sub>3</sub> from n-alkyl chains); <sup>13</sup>C-NMR (CDCl<sub>3</sub>), δ, ppm: 172.9 (CO), 158.6 (C-4 pyridinium), 158.4 (C-2 pyridinium), 155.3 (C-6 pyridinium), 128.8 (C-5 pyridinium), 126.9 (C-3 pyridinium), 60.7 (COO-CH<sub>2</sub>), 49.7 (N<sup>+</sup>-CH<sub>2</sub>), 33.6 (O-CO-CH<sub>2</sub>-), 33.3 (CαPy-CH<sub>2</sub>-), 31.9, 31.8, 29.6 (4C), 29.5 (3C), 29.4 (2C), 29.3 (3C), 29.2 (2C), 29.0, 28.3, 24.5, 22.6 (2C), 21.7 (CH<sub>3</sub> γ-pyridinium), 21.5 (CH<sub>3</sub> α-pyridinium), 14.1 (2 CH<sub>3</sub> from n-alkyl chains). Anal. (C<sub>35</sub>H<sub>64</sub>NO<sub>2</sub><sup>+</sup> PF<sub>6</sub><sup>-</sup>), C, H, N.

#### **4,6-Dimethyl-2-tetradecyl-1-(2-tetradecanoyloxyethyl)pyridinium**

**hexafluorophosphate 52b:** T<sub>c</sub> = 68.5 °C; Yield 90%; <sup>1</sup>H-NMR (CDCl<sub>3</sub>), δ, ppm: 7.49 (s, 1H, H-5 pyridinium), 7.40 (s, 1H, H-3 pyridinium), 4.77 (t, *J* = 6.0 Hz, 2H, N<sup>+</sup>-CH<sub>2</sub>), 4.46 (t, *J* = 5.9 Hz, 2H, COO-CH<sub>2</sub>), 3.04 (t, *J* = 8.0 Hz, 2H, CαPy-CH<sub>2</sub>), 2.85 (s, 3H, CH<sub>3</sub> α-pyridinium), 2.54 (s, 3H, CH<sub>3</sub> γ-pyridinium), 2.24 (t, *J* = 7.6 Hz, 2H, O-CO-CH<sub>2</sub>), 1.76 (cv, *J* = 7.9 Hz, 2H, Cα-CH<sub>2</sub>CH<sub>2</sub>), 1.51 (cv, *J* = 7.6 Hz, O-CO-CH<sub>2</sub>CH<sub>2</sub>), 1.46 (cv, *J* = 7.8 Hz, 2H, Cα-CH<sub>2</sub>CH<sub>2</sub>CH<sub>2</sub>), 1.36 (m, 2H, O-CO-CH<sub>2</sub>CH<sub>2</sub>CH<sub>2</sub>), 1.25 (m, 38H, 19 CH<sub>2</sub> from n-alkyl chains), 0.88 (t, *J* = 6.8 Hz, 6H, 2 CH<sub>3</sub> from n-alkyl chains); <sup>13</sup>C-NMR (CDCl<sub>3</sub>), δ, ppm: 172.9 (CO), 158.6 (C-4 pyridinium), 158.4 (C-2 pyridinium), 155.2 (C-6 pyridinium), 128.8 (C-5 pyridinium), 126.9 (C-3 pyridinium), 60.7 (COO-CH<sub>2</sub>), 49.7 (N<sup>+</sup>-CH<sub>2</sub>), 33.6 (O-CO-CH<sub>2</sub>-), 33.2 (CαPy-CH<sub>2</sub>-), 31.9 (2C), 29.6 (4C), 29.5 (3C), 29.4 (2C), 29.3 (3C), 29.2 (4C), 29.0, 28.3, 24.5, 22.6 (2C), 21.7 (CH<sub>3</sub> γ-pyridinium),

21.5 (CH<sub>3</sub> α-pyridinium), 14.1 (2 CH<sub>3</sub> from n-alkyl chains). Anal. (C<sub>37</sub>H<sub>68</sub>NO<sub>2</sub><sup>+</sup> PF<sub>6</sub><sup>-</sup>), C, H, N.

**4,6-Dimethyl-2-tetradecyl-1-(2-hexadecanoyloxyethyl)pyridinium**

**hexafluorophosphate 52c:** T<sub>c</sub> = 77.8 °C; Yield 91%; <sup>1</sup>H-NMR (CDCl<sub>3</sub>), δ, ppm: 7.48 (s, 1H, H-5 pyridinium), 7.40 (s, 1H, H-3 pyridinium), 4.77 (t, *J* = 5.6 Hz, 2H, N<sup>+</sup>-CH<sub>2</sub>), 4.46 (t, *J* = 5.7 Hz, 2H, COO-CH<sub>2</sub>), 3.04 (t, *J* = 7.8 Hz, 2H, CαPy-CH<sub>2</sub>), 2.85 (s, 3H, CH<sub>3</sub> α-pyridinium), 2.54 (s, 3H, CH<sub>3</sub> γ-pyridinium), 2.24 (t, *J* = 7.3 Hz, 2H, O-CO-CH<sub>2</sub>), 1.77 (cv, *J* = 7.3 Hz, 2H, Cα-CH<sub>2</sub>CH<sub>2</sub>), 1.51 (cv, *J* = 7.3 Hz, O-CO-CH<sub>2</sub>CH<sub>2</sub>), 1.47 (cv, *J* = 7.6 Hz, 2H, Cα-CH<sub>2</sub>CH<sub>2</sub>CH<sub>2</sub>), 1.36 (m, 2H, O-CO-CH<sub>2</sub>CH<sub>2</sub>CH<sub>2</sub>), 1.26 (m, 42H, 21 CH<sub>2</sub> from n-alkyl chains), 0.88 (t, *J* = 6.8 Hz, 6H, 2 CH<sub>3</sub> from n-alkyl chains); <sup>13</sup>C-NMR (CDCl<sub>3</sub>), δ, ppm: 173.0 (CO), 158.6 (C-4 pyridinium), 158.4 (C-2 pyridinium), 155.3 (C-6 pyridinium), 128.8 (C-5 pyridinium), 126.9 (C-3 pyridinium), 60.7 (COO-CH<sub>2</sub>), 49.7 (N<sup>+</sup>-CH<sub>2</sub>), 33.7 (O-CO-CH<sub>2</sub>-), 33.3 (CαPy-CH<sub>2</sub>-), 31.9 (2C), 29.7 (6C), 29.6 (3C), 29.4 (3C), 29.3 (3C), 29.2 (2C), 29.0 (2C), 28.3, 24.6, 22.6 (2C), 21.7 (CH<sub>3</sub> γ-pyridinium), 21.5 (CH<sub>3</sub> α-pyridinium), 14.1 (2 CH<sub>3</sub> from n-alkyl chains). Anal. (C<sub>39</sub>H<sub>72</sub>NO<sub>2</sub><sup>+</sup> PF<sub>6</sub><sup>-</sup>), C, H, N.

**4,6-Dimethyl-2-tetradecyl-1-(2-aminoethyl)pyridinium hexafluorophosphate 53:** mp = 61.4 °C; <sup>1</sup>H-NMR (CDCl<sub>3</sub>), δ, ppm: 7.46 (s, 1H, H-5 pyridinium), 7.38 (s, 1H, H-3 pyridinium), 4.49 (t, *J* = 6.7 Hz, 2H, N<sup>+</sup>-CH<sub>2</sub>), 3.15 (t, *J* = 6.7 Hz, 2H, H<sub>2</sub>N-CH<sub>2</sub>), 3.05 (t, *J* = 8.0 Hz, 2H, CαPy-CH<sub>2</sub>), 2.85 (s, 3H, CH<sub>3</sub> α-pyridinium), 2.53 (s, 3H, CH<sub>3</sub> γ-pyridinium), 1.72 (cv, *J* = 7.8 Hz, 2H, Cα-CH<sub>2</sub>CH<sub>2</sub>), 1.44 (cv, *J* = 7.6 Hz, 2H, Cα-CH<sub>2</sub>CH<sub>2</sub>CH<sub>2</sub>), 1.25 (m, 22H, 11 CH<sub>2</sub> from n-alkyl chain), 0.87 (t, *J* = 6.7 Hz, 3H, CH<sub>3</sub> from n-alkyl chain); <sup>13</sup>C-NMR (CDCl<sub>3</sub>), δ, ppm: 158.2 (C-2 pyridinium), 157.7 (C-4 pyridinium), 154.9 (C-6 pyridinium), 128.7 (C-5 pyridinium), 127.0 (C-3 pyridinium), 53.6 (N<sup>+</sup>-CH<sub>2</sub>), 40.9 (H<sub>2</sub>N-CH<sub>2</sub>), 33.5 (CαPy-CH<sub>2</sub>-), 31.9, 29.6 (6C), 29.5, 29.4, 29.3, 29.2 (2C), 28.7, 22.6, 21.7 (CH<sub>3</sub> γ-pyridinium), 21.5 (CH<sub>3</sub> α-pyridinium), 14.1 (CH<sub>3</sub> from n-alkyl chain). Anal. (C<sub>23</sub>H<sub>43</sub>N<sub>2</sub><sup>+</sup> PF<sub>6</sub><sup>-</sup>), C, H, N.

**4,6-Dimethyl-2-tetradecyl-1-(2-dodecanoylamidoethyl)pyridinium chloride 54a:** T<sub>c</sub> = 41.9 °C; Yield 51%; <sup>1</sup>H-NMR (CDCl<sub>3</sub>), δ, ppm: 7.43 (s, 1H, H-5 pyridinium), 7.36 (s,

1H, H-3 pyridinium), 7.03 (br.s., 1H, NH), 4.55 (t,  $J = 7.1$  Hz, 2H, N<sup>+</sup>-CH<sub>2</sub>), 3.61 (q,  $J = 6.8$  Hz, 2H, CONH-CH<sub>2</sub>), 3.17 (t,  $J = 7.7$  Hz, 2H, CαPy-CH<sub>2</sub>), 2.89 (s, 3H, CH<sub>3</sub> α-pyridinium), 2.53 (s, 3H, CH<sub>3</sub> γ-pyridinium), 2.16 (t,  $J = 7.7$  Hz, 2H, NH-CO-CH<sub>2</sub>), 1.71 (cv,  $J = 7.7$  Hz, 2H, Cα-CH<sub>2</sub>CH<sub>2</sub>), 1.53 (cv,  $J = 6.9$  Hz, NH-CO-CH<sub>2</sub>CH<sub>2</sub>), 1.46 (cv,  $J = 7.5$  Hz, 2H, Cα-CH<sub>2</sub>CH<sub>2</sub>CH<sub>2</sub>), 1.25 (m, 36H, 18 CH<sub>2</sub> from n-alkyl chains), 0.87 (t,  $J = 6.7$  Hz, 6H, 2 CH<sub>3</sub> from n-alkyl chains); <sup>13</sup>C-NMR (CDCl<sub>3</sub>), δ, ppm: 175.3 (CO), 158.8 (C-2 pyridinium), 157.9 (C-4 pyridinium), 155.0 (C-6 pyridinium), 128.6 (C-5 pyridinium), 127.1 (C-3 pyridinium), 50.3 (N<sup>+</sup>-CH<sub>2</sub>), 37.9 (CONH-CH<sub>2</sub>), 35.9 (NH-CO-CH<sub>2</sub>-), 33.1 (CαPy-CH<sub>2</sub>-), 31.9, 31.8, 29.6 (2C), 29.4 (2C), 29.3 (4C), 29.2 (2C), 29.1, 29.0, 25.4, 25.0, 22.6 (2C), 21.6 (CH<sub>3</sub> γ-pyridinium), 21.3 (CH<sub>3</sub> α-pyridinium), 14.0 (2 CH<sub>3</sub> from n-alkyl chains). Anal. (C<sub>35</sub>H<sub>65</sub>N<sub>2</sub>O<sup>+</sup> Cl<sup>-</sup>), C, H, N.

**4,6-Dimethyl-2-tetradecyl-1-(2-tetradecanoylamidoethyl)pyridinium chloride 54b:**

T<sub>c</sub> = 49.9 °C; Yield 55%; <sup>1</sup>H-NMR (CDCl<sub>3</sub>), δ, ppm: 7.44 (s, 1H, H-5 pyridinium), 7.37 (s, 1H, H-3 pyridinium), 6.80 (t,  $J = 6.2$  Hz, 1H, NH), 4.54 (t,  $J = 7.1$  Hz, 2H, N<sup>+</sup>-CH<sub>2</sub>), 3.61 (q,  $J = 6.8$  Hz, 2H, CONH-CH<sub>2</sub>), 3.17 (t,  $J = 7.6$  Hz, 2H, CαPy-CH<sub>2</sub>), 2.89 (s, 3H, CH<sub>3</sub> α-pyridinium), 2.54 (s, 3H, CH<sub>3</sub> γ-pyridinium), 2.16 (t,  $J = 7.7$  Hz, 2H, NH-CO-CH<sub>2</sub>), 1.72 (cv,  $J = 7.6$  Hz, 2H, Cα-CH<sub>2</sub>CH<sub>2</sub>), 1.54 (cv,  $J = 6.8$  Hz, NH-CO-CH<sub>2</sub>CH<sub>2</sub>), 1.47 (cv,  $J = 7.5$  Hz, 2H, Cα-CH<sub>2</sub>CH<sub>2</sub>CH<sub>2</sub>), 1.25 (m, 40H, 20 CH<sub>2</sub> from n-alkyl chains), 0.87 (t,  $J = 6.7$  Hz, 6H, 2 CH<sub>3</sub> from n-alkyl chains); <sup>13</sup>C-NMR (CDCl<sub>3</sub>), δ, ppm: 175.0 (CO), 158.8 (C-2 pyridinium), 158.0 (C-4 pyridinium), 154.9 (C-6 pyridinium), 128.6 (C-5 pyridinium), 127.1 (C-3 pyridinium), 50.3 (N<sup>+</sup>-CH<sub>2</sub>), 37.9 (CONH-CH<sub>2</sub>), 35.9 (NH-CO-CH<sub>2</sub>-), 33.1 (CαPy-CH<sub>2</sub>-), 31.9 (2C), 29.7 (4C), 29.5 (2C), 29.3 (4C), 29.1 (2C), 29.0, 25.4, 22.6 (2C), 21.6 (CH<sub>3</sub> γ-pyridinium), 21.3 (CH<sub>3</sub> α-pyridinium), 14.1 (2 CH<sub>3</sub> from n-alkyl chains). Anal. (C<sub>37</sub>H<sub>69</sub>N<sub>2</sub>O<sup>+</sup> Cl<sup>-</sup>), C, H, N.

**4,6-Dimethyl-2-tetradecyl-1-(2-hexadecanoylamidoethyl)pyridinium chloride 54c:**

T<sub>c</sub> = 46.8 °C; Yield 48%; <sup>1</sup>H-NMR (CDCl<sub>3</sub>), δ, ppm: 7.44 (s, 1H, H-5 pyridinium), 7.37 (s, 1H, H-3 pyridinium), 6.76 (t,  $J = 6.2$  Hz, 1H, NH), 4.53 (t,  $J = 7.1$  Hz, 2H, N<sup>+</sup>-CH<sub>2</sub>), 3.60 (q,  $J = 6.8$  Hz, 2H, CONH-CH<sub>2</sub>), 3.17 (t,  $J = 7.5$  Hz, 2H, CαPy-CH<sub>2</sub>), 2.89 (s, 3H, CH<sub>3</sub> α-pyridinium), 2.54 (s, 3H, CH<sub>3</sub> γ-pyridinium), 2.16 (t,  $J = 7.6$  Hz, 2H, NH-CO-CH<sub>2</sub>), 1.72

(cv,  $J = 7.6$  Hz, 2H, C $\alpha$ -CH<sub>2</sub>CH<sub>2</sub>), 1.54 (cv,  $J = 6.8$  Hz, NH-CO-CH<sub>2</sub>CH<sub>2</sub>), 1.47 (cv,  $J = 7.5$  Hz, 2H, C $\alpha$ -CH<sub>2</sub>CH<sub>2</sub>CH<sub>2</sub>), 1.25 (m, 44H, 22 CH<sub>2</sub> from n-alkyl chains), 0.87 (t,  $J = 6.6$  Hz, 6H, 2 CH<sub>3</sub> from n-alkyl chains); <sup>13</sup>C-NMR (CDCl<sub>3</sub>),  $\delta$ , ppm: 175.1 (CO), 158.7 (C-2 pyridinium), 158.0 (C-4 pyridinium), 154.9 (C-6 pyridinium), 128.6 (C-5 pyridinium), 127.1 (C-3 pyridinium), 50.2 (N<sup>+</sup>-CH<sub>2</sub>), 38.0 (CONH-CH<sub>2</sub>), 35.9 (NH-CO-CH<sub>2</sub>-), 33.0 (C $\alpha$ Py-CH<sub>2</sub>-), 31.9 (2C), 29.7 (4C), 29.6 (4C), 29.5 (2C), 29.4 (2C), 29.3 (6C), 29.2, 29.1, 29.0, 25.4, 22.6 (2C), 21.6 (CH<sub>3</sub>  $\gamma$ -pyridinium), 21.3 (CH<sub>3</sub>  $\alpha$ -pyridinium), 14.1 (2 CH<sub>3</sub> from n-alkyl chains). Anal. (C<sub>39</sub>H<sub>73</sub>N<sub>2</sub>O<sup>+</sup> Cl<sup>-</sup>), C, H, N.

**4,6-Dimethyl-2-tetradecyl-1-(2-mercaptoethyl)pyridinium hexafluorophosphate 55:** mp = 71.9 °C; <sup>1</sup>H-NMR (CDCl<sub>3</sub>),  $\delta$ , ppm: 7.48 (s, 1H, H-5 pyridinium), 7.40 (s, 1H, H-3 pyridinium), 4.49 (t,  $J = 7.1$  Hz, 2H, N<sup>+</sup>-CH<sub>2</sub>), 2.99 (t,  $J = 7.5$  Hz, 2H, C $\alpha$ Py-CH<sub>2</sub>), 2.92 (q,  $J = 6.6$  Hz, 2H, HS-CH<sub>2</sub>) 2.81 (s, 3H, CH<sub>3</sub>  $\alpha$ -pyridinium), 2.53 (s, 3H, CH<sub>3</sub>  $\gamma$ -pyridinium), 1.83 (t,  $J = 8.2$  Hz, 1H, HS-CH<sub>2</sub>), 1.74 (m, 2H, C $\alpha$ -CH<sub>2</sub>CH<sub>2</sub>), 1.45 (m, 2H, C $\alpha$ -CH<sub>2</sub>CH<sub>2</sub>CH<sub>2</sub>), 1.25 (m, 22H, 11 CH<sub>2</sub> from n-alkyl chain), 0.87 (t,  $J = 6.5$  Hz, 3H, CH<sub>3</sub> from n-alkyl chain); <sup>13</sup>C-NMR (CDCl<sub>3</sub>),  $\delta$ , ppm: 158.5 (C-4 pyridinium), 157.7 (C-2 pyridinium), 154.4 (C-6 pyridinium), 129.0 (C-5 pyridinium), 127.3 (C-3 pyridinium), 53.3 (N<sup>+</sup>-CH<sub>2</sub>), 33.4 (C $\alpha$ Py-CH<sub>2</sub>-), 31.9, 29.6 (4C), 29.5, 29.4, 29.3, 29.2 (2C), 28.7, 22.6, 21.6 (CH<sub>3</sub>  $\gamma$ -pyridinium), 21.3 (CH<sub>3</sub>  $\alpha$ -pyridinium), 14.1 (CH<sub>3</sub> from n-alkyl chain). Anal. (C<sub>23</sub>H<sub>42</sub>NS<sup>+</sup> PF<sub>6</sub><sup>-</sup>), C, H, N.

**4,6-Dimethyl-2-tetradecyl-1-(3,4-dithia-tetradecyl)pyridinium 56a:** hexafluorophosphate T<sub>c</sub> = 76.0 °C; Yield 58%; <sup>1</sup>H-NMR (CDCl<sub>3</sub>),  $\delta$ , ppm: 7.48 (s, 1H, H-5 pyridinium), 7.41 (s, 1H, H-3 pyridinium), 4.70 (t,  $J = 8.0$  Hz, 2H, N<sup>+</sup>-CH<sub>2</sub>), 3.04 (t,  $J = 8.2$  Hz, 2H, C $\alpha$ Py-CH<sub>2</sub>), 3.02 (t,  $J = 8.0$  Hz, 2H, RSS-CH<sub>2</sub>CH<sub>2</sub>N<sup>+</sup>), 2.83 (s, 3H, CH<sub>3</sub>  $\alpha$ -pyridinium), 2.76 (t,  $J = 7.4$  Hz, 2H, RCH<sub>2</sub>SS-CH<sub>2</sub>CH<sub>2</sub>N<sup>+</sup>), 2.53 (s, 3H, CH<sub>3</sub>  $\gamma$ -pyridinium), 1.77 (cv,  $J = 7.8$  Hz, 2H, C $\alpha$ -CH<sub>2</sub>CH<sub>2</sub>), 1.68 (cv,  $J = 7.4$  Hz, 2H, RCH<sub>2</sub>CH<sub>2</sub>SS-CH<sub>2</sub>CH<sub>2</sub>N<sup>+</sup>), 1.47 (cv,  $J = 7.4$  Hz, 2H, C $\alpha$ -CH<sub>2</sub>CH<sub>2</sub>CH<sub>2</sub>), 1.38 (m, 2H, RCH<sub>2</sub>CH<sub>2</sub>CH<sub>2</sub>SS-CH<sub>2</sub>CH<sub>2</sub>N<sup>+</sup>), 1.26 (m, 32H, 16 CH<sub>2</sub> from n-alkyl chains), 0.88 (t,  $J = 6.7$  Hz, 6H, 2 CH<sub>3</sub> from n-alkyl chains); <sup>13</sup>C-NMR (CDCl<sub>3</sub>),  $\delta$ , ppm: 158.6 (C-4 pyridinium), 157.7 (C-2 pyridinium), 154.3 (C-6 pyridinium), 129.1 (C-5 pyridinium),

127.4 (C-3 pyridinium), 51.0 ( $\text{N}^+-\underline{\text{CH}_2}$ ), 39.0 ( $\text{N}^+\text{CH}_2\text{CH}_2\text{SS}-\underline{\text{CH}_2}$ ), 35.2 ( $\text{N}^+\text{CH}_2\underline{\text{CH}_2}\text{SS}$ ), 33.3 ( $\text{C}\alpha\text{Py}-\underline{\text{CH}_2}$ -), 31.9, 31.8, 29.6 (4C), 29.5 (3C), 29.4, 29.3 (3C), 29.2, 29.1 (2C), 28.8, 28.4, 22.6 (2C), 21.6 ( $\text{CH}_3$   $\gamma$ -pyridinium), 21.2 ( $\text{CH}_3$   $\alpha$ -pyridinium), 14.1 (2  $\text{CH}_3$  from n-alkyl chains). Anal. ( $\text{C}_{33}\text{H}_{62}\text{NS}_2^+ \text{PF}_6^-$ ), C, H, N; **chloride**  $T_c = 77.4$  °C; Yield 82% (from hexafluorophosphate); Anal. ( $\text{C}_{33}\text{H}_{62}\text{NS}_2^+ \text{Cl}^-$ ), C, H, N.

**4,6-Dimethyl-2-tetradecyl-1-(3,4-dithia-hexadecyl)pyridinium** **56b:**

**hexafluorophosphate**  $T_c = 81.0$  °C; Yield 63%;  $^1\text{H}$ -NMR ( $\text{CDCl}_3$ ),  $\delta$ , ppm: 7.48 (s, 1H, H-5 pyridinium), 7.41 (s, 1H, H-3 pyridinium), 4.70 (t,  $J = 8.0$  Hz, 2H,  $\text{N}^+-\underline{\text{CH}_2}$ ), 3.03 (t,  $J = 8.4$  Hz, 2H,  $\text{C}\alpha\text{Py}-\underline{\text{CH}_2}$ ), 3.01 (t,  $J = 8.0$  Hz, 2H,  $\text{RSS}-\underline{\text{CH}_2}\text{CH}_2\text{N}^+$ ), 2.83 (s, 3H,  $\text{CH}_3$   $\alpha$ -pyridinium), 2.76 (t,  $J = 7.4$  Hz, 2H,  $\text{RCH}_2\text{SS}-\text{CH}_2\text{CH}_2\text{N}^+$ ), 2.53 (s, 3H,  $\text{CH}_3$   $\gamma$ -pyridinium), 1.77 (cv,  $J = 7.8$  Hz, 2H,  $\text{C}\alpha-\text{CH}_2\underline{\text{CH}_2}$ ), 1.68 (cv,  $J = 7.4$  Hz, 2H,  $\text{RCH}_2\text{CH}_2\text{SS}-\text{CH}_2\text{CH}_2\text{N}^+$ ), 1.47 (cv,  $J = 7.4$  Hz, 2H,  $\text{C}\alpha-\text{CH}_2\text{CH}_2\underline{\text{CH}_2}$ ), 1.37 (m, 2H,  $\text{RCH}_2\text{CH}_2\text{CH}_2\text{SS}-\text{CH}_2\text{CH}_2\text{N}^+$ ), 1.26 (m, 36H, 18  $\text{CH}_2$  from n-alkyl chains), 0.88 (t,  $J = 6.7$  Hz, 6H, 2  $\text{CH}_3$  from n-alkyl chains);  $^{13}\text{C}$ -NMR ( $\text{CDCl}_3$ ),  $\delta$ , ppm: 158.6 (C-4 pyridinium), 157.7 (C-2 pyridinium), 154.3 (C-6 pyridinium), 129.1 (C-5 pyridinium), 127.4 (C-3 pyridinium), 50.9 ( $\text{N}^+-\underline{\text{CH}_2}$ ), 39.0 ( $\text{N}^+\text{CH}_2\text{CH}_2\text{SS}-\underline{\text{CH}_2}$ ), 35.1 ( $\text{N}^+\text{CH}_2\underline{\text{CH}_2}\text{SS}$ ), 33.3 ( $\text{C}\alpha\text{Py}-\underline{\text{CH}_2}$ -), 31.9, 29.7 (2C), 29.6 (5C), 29.55 (2C), 29.4, 29.3 (4C), 29.2, 29.1 (2C), 28.8, 28.4, 22.6 (2C), 21.6 ( $\text{CH}_3$   $\gamma$ -pyridinium), 21.2 ( $\text{CH}_3$   $\alpha$ -pyridinium), 14.1 (2  $\text{CH}_3$  from n-alkyl chains). Anal. ( $\text{C}_{35}\text{H}_{66}\text{NS}_2^+ \text{PF}_6^-$ ), C, H, N; **chloride**  $T_c = 75.1$  °C; Yield 76% (from hexafluorophosphate); Anal. ( $\text{C}_{35}\text{H}_{66}\text{NS}_2^+ \text{Cl}^-$ ), C, H, N.

**4,6-Dimethyl-2-tetradecyl-1-(3,4-dithia-octadecyl)pyridinium** **56c:**

**hexafluorophosphate**  $T_c = 81.8$  °C; Yield 65%;  $^1\text{H}$ -NMR ( $\text{CDCl}_3$ ),  $\delta$ , ppm: 7.48 (s, 1H, H-5 pyridinium), 7.41 (s, 1H, H-3 pyridinium), 4.70 (t,  $J = 8.1$  Hz, 2H,  $\text{N}^+-\underline{\text{CH}_2}$ ), 3.04 (t,  $J = 8.4$  Hz, 2H,  $\text{C}\alpha\text{Py}-\underline{\text{CH}_2}$ ), 3.02 (t,  $J = 8.0$  Hz, 2H,  $\text{RSS}-\underline{\text{CH}_2}\text{CH}_2\text{N}^+$ ), 2.83 (s, 3H,  $\text{CH}_3$   $\alpha$ -pyridinium), 2.76 (t,  $J = 7.4$  Hz, 2H,  $\text{RCH}_2\text{SS}-\text{CH}_2\text{CH}_2\text{N}^+$ ), 2.54 (s, 3H,  $\text{CH}_3$   $\gamma$ -pyridinium), 1.77 (cv,  $J = 7.8$  Hz, 2H,  $\text{C}\alpha-\text{CH}_2\underline{\text{CH}_2}$ ), 1.68 (cv,  $J = 7.4$  Hz, 2H,  $\text{RCH}_2\text{CH}_2\text{SS}-\text{CH}_2\text{CH}_2\text{N}^+$ ), 1.48 (cv,  $J = 7.6$  Hz, 2H,  $\text{C}\alpha-\text{CH}_2\text{CH}_2\underline{\text{CH}_2}$ ), 1.37 (m, 2H,  $\text{RCH}_2\text{CH}_2\text{CH}_2\text{SS}-\text{CH}_2\text{CH}_2\text{N}^+$ ), 1.26 (m, 40H, 20  $\text{CH}_2$  from n-alkyl chains), 0.88 (t,  $J = 6.7$  Hz, 6H, 2  $\text{CH}_3$  from n-alkyl chains);  $^{13}\text{C}$ -NMR ( $\text{CDCl}_3$ ),  $\delta$ , ppm: 158.6 (C-4



pyridinium), 157.7 (C-2 pyridinium), 154.3 (C-6 pyridinium), 129.1 (C-5 pyridinium), 127.4 (C-3 pyridinium), 50.9 ( $\text{N}^+-\underline{\text{CH}_2}$ ), 39.0 ( $\text{N}^+\text{CH}_2\text{CH}_2\text{SS}-\underline{\text{CH}_2}$ ), 35.1 ( $\text{N}^+\text{CH}_2\underline{\text{CH}_2\text{SS}}$ ), 33.3 ( $\text{C}\alpha\text{Py}-\underline{\text{CH}_2-}$ ), 31.9, 29.7 (5C), 29.6 (5C), 29.5, 29.4, 29.3 (4C), 29.2, 29.1 (2C), 28.8, 28.4, 22.6 (2C), 21.7 ( $\text{CH}_3 \gamma$ -pyridinium), 21.2 ( $\text{CH}_3 \alpha$ -pyridinium), 14.1 (2  $\text{CH}_3$  from n-alkyl chains). Anal. ( $\text{C}_{37}\text{H}_{70}\text{NS}_2^+ \text{PF}_6^-$ ), C, H, N; **chloride**  $T_c = 86.9^\circ\text{C}$ ; Yield 78% (from hexafluorophosphate); Anal. ( $\text{C}_{37}\text{H}_{70}\text{NS}_2^+ \text{Cl}^-$ ), C, H, N.

**1,6-Bis(4,6-dimethyl-2-tetradecylpyridinium-1-yl)-3,4-dithiahexane**

**dihexafluorophosphate 57:** hexafluorophosphate  $T_c = 107.0^\circ\text{C}$ ; Yield 71%;  $^1\text{H-NMR}$  ( $\text{CDCl}_3$ ),  $\delta$ , ppm: 7.44 (s, 2H, 2 H-5 pyridinium), 7.36 (s, 2H, 2 H-3 pyridinium), 4.71 (t,  $J = 7.5$  Hz, 4H, 2  $\text{N}^+-\underline{\text{CH}_2}$ ), 3.16 (t,  $J = 7.6$  Hz, 4H, 2  $\text{N}^+-\text{CH}_2\underline{\text{CH}_2\text{S-S}}$ ), 3.01 (t,  $J = 7.7$  Hz, 4H, 2  $\text{C}\alpha\text{Py}-\underline{\text{CH}_2}$ ) 2.82 (s, 6H, 2  $\text{CH}_3 \alpha$ -pyridinium), 2.50 (s, 6H, 2  $\text{CH}_3 \gamma$ -pyridinium), 1.75 (cv,  $J = 7.1$  Hz, 4H, 2  $\text{C}\alpha-\text{CH}_2\underline{\text{CH}_2}$ ), 1.44 (cv,  $J = 6.5$  Hz, 4H, 2  $\text{C}\alpha-\text{CH}_2\text{CH}_2\underline{\text{CH}_2}$ ), 1.27 (m, 40H, 20  $\text{CH}_2$  from n-alkyl chain), 0.87 (t,  $J = 6.6$  Hz, 6H, 3  $\text{CH}_3$  from n-alkyl chain);  $^{13}\text{C-NMR}$  ( $\text{CDCl}_3$ ),  $\delta$ , ppm: 158.5 (2 C-4 pyridinium), 157.7 (2 C-2 pyridinium), 154.5 (2 C-6 pyridinium), 128.9 (2 C-5 pyridinium), 127.3 (2 C-3 pyridinium), 50.7 (2  $\text{N}^+-\underline{\text{CH}_2}$ ), 34.8 (2  $\text{N}^+-\text{CH}_2\underline{\text{CH}_2\text{S}}$ ), 33.2 (2  $\text{C}\alpha\text{Py}-\underline{\text{CH}_2-}$ ), 31.9 (2C), 29.7 (6C), 29.6 (4C), 29.4 (2C), 29.3 (2C), 29.2 (4C), 28.5 (2C), 22.6 (2C), 21.6 (2  $\text{CH}_3 \gamma$ -pyridinium), 21.0 (2  $\text{CH}_3 \alpha$ -pyridinium), 14.1 (2  $\text{CH}_3$  from n-alkyl chain). Anal. ( $\text{C}_{46}\text{H}_{82}\text{N}_2\text{S}_2^+ \text{PF}_6^-$ ), C, H, N; **chloride**  $T_c = 139.3^\circ\text{C}$ ; Yield 79% (from hexafluorophosphate); Anal. ( $\text{C}_{46}\text{H}_{82}\text{N}_2\text{S}_2^+ \text{Cl}^-$ ), C, H, N.

## 2. Elemental analysis data for the compounds described in the paper

| No.        | Formula                         | Elemental analysis data (calc./found) |             |           |
|------------|---------------------------------|---------------------------------------|-------------|-----------|
|            |                                 | %C                                    | %H          | %N        |
| <b>14a</b> | $C_{17}H_{29}O^+ PF_6^-$        | 51.77/51.86                           | 7.41/7.54   | -         |
| <b>14b</b> | $C_{18}H_{31}O^+ PF_6^-$        | 52.94/53.22                           | 7.65/7.72   | -         |
| <b>14c</b> | $C_{19}H_{33}O^+ PF_6^-$        | 54.02/54.11                           | 7.87/7.94   | -         |
| <b>14d</b> | $C_{20}H_{35}O^+ PF_6^-$        | 55.04/55.31                           | 8.08/8.28   | -         |
| <b>14e</b> | $C_{21}H_{37}O^+ PF_6^-$        | 55.99/56.17                           | 8.28/8.40   | -         |
| <b>14f</b> | $C_{22}H_{39}O^+ PF_6^-$        | 56.88/57.06                           | 8.46/8.64   | -         |
| <b>14g</b> | $C_{23}H_{41}O^+ PF_6^-$        | 57.73/57.92                           | 8.64/8.89   | -         |
| <b>14h</b> | $C_{24}H_{43}O^+ PF_6^-$        | 58.52/58.71                           | 8.80/8.96   | -         |
| <b>15</b>  | $C_{27}H_{50}N^+ PF_6^-$        | 60.77/60.94                           | 9.44/9.14   | 2.62/2.63 |
| <b>16</b>  | $C_{29}H_{54}N^+ PF_6^-$        | 62.01/62.38                           | 9.69/9.30   | 2.49/2.38 |
| <b>17</b>  | $C_{28}H_{52}N^+ PF_6^-$        | 61.40/61.53                           | 9.57/9.37   | 2.56/2.55 |
| <b>18</b>  | $C_{30}H_{56}N^+ PF_6^-$        | 62.58/62.49                           | 9.80/9.77   | 2.43/2.46 |
| <b>19</b>  | $C_{29}H_{54}N^+ PF_6^-$        | 62.01/61.95                           | 9.69/9.38   | 2.49/2.55 |
| <b>20</b>  | $C_{31}H_{58}N^+ PF_6^-$        | 63.13/63.13                           | 9.91/9.57   | 2.37/2.45 |
| <b>21</b>  | $C_{30}H_{56}N^+ PF_6^-$        | 62.58/62.76                           | 9.80/9.57   | 2.43/2.33 |
| <b>22</b>  | $C_{32}H_{60}N^+ PF_6^-$        | 63.66/63.54                           | 10.02/9.68  | 2.32/2.31 |
| <b>23</b>  | $C_{35}H_{66}N^+ PF_6^-$        | 65.09/65.29                           | 10.30/9.97  | 2.17/2.18 |
| <b>24</b>  | $C_{36}H_{68}N^+ PF_6^-$        | 65.52/65.16                           | 10.39/10.41 | 2.12/1.93 |
| <b>25</b>  | $C_{38}H_{72}N^+ PF_6^-$        | 66.34/66.19                           | 10.55/10.42 | 2.04/2.18 |
| <b>26</b>  | $C_{39}H_{74}N^+ PF_6^-$        | 66.73/66.47                           | 10.63/10.33 | 2.00/2.36 |
| <b>27</b>  | $C_{40}H_{76}N^+ PF_6^-$        | 67.10/66.75                           | 10.70/10.38 | 1.96/1.97 |
| <b>28</b>  | $C_{42}H_{80}N^+ PF_6^-$        | 67.80/67.42                           | 10.84/10.83 | 1.88/1.53 |
| <b>29</b>  | $C_{44}H_{78}N_2^+ 2PF_6^-$     | 57.13/57.41                           | 8.50/8.13   | 3.03/3.26 |
| <b>30</b>  | $C_{45}H_{80}N_2^+ 2PF_6^-$     | 57.56/57.73                           | 8.59/8.68   | 2.98/3.01 |
| <b>31</b>  | $C_{46}H_{82}N_2^+ 2PF_6^-$     | 57.97/58.22                           | 8.67/8.88   | 2.94/2.75 |
| <b>32</b>  | $C_{47}H_{84}N_2^+ 2PF_6^-$     | 58.37/58.42                           | 8.75/8.93   | 2.90/2.83 |
| <b>33</b>  | $C_{48}H_{86}N_2^+ 2PF_6^-$     | 58.76/58.72                           | 8.83/8.61   | 2.86/2.45 |
| <b>34</b>  | $C_{49}H_{88}N_2^+ 2PF_6^-$     | 59.14/59.09                           | 8.91/9.16   | 2.81/2.64 |
| <b>35</b>  | $C_{50}H_{90}N_2^+ 2PF_6^-$     | 59.51/59.78                           | 8.99/9.22   | 2.78/2.77 |
| <b>40a</b> | $C_{51}H_{91}N_3O_2^+ 2PF_6^-$  | 57.34/57.65                           | 8.59/8.26   | 3.93/4.05 |
| <b>40b</b> | $C_{53}H_{95}N_3O_2^+ 2PF_6^-$  | 58.07/58.40                           | 8.73/8.93   | 3.83/4.11 |
| <b>40c</b> | $C_{54}H_{97}N_3O_2^+ 2PF_6^-$  | 58.41/58.13                           | 8.81/8.72   | 3.78/3.56 |
| <b>46</b>  | $C_{62}H_{112}N_4O_4^+ 2PF_6^-$ | 58.75/59.09                           | 8.91/9.28   | 4.42/4.64 |

| No.        | Formula                       | Elemental analysis data (calc./found) |             |           |
|------------|-------------------------------|---------------------------------------|-------------|-----------|
|            |                               | %C                                    | %H          | %N        |
| <b>41a</b> | $C_{46}H_{83}N_3^+ 2PF_6^-$   | 57.07/57.25                           | 8.64/8.86   | 4.34/4.21 |
| <b>41b</b> | $C_{48}H_{87}N_3^+ 2PF_6^-$   | 57.87/57.49                           | 8.80/8.62   | 4.22/4.34 |
| <b>41c</b> | $C_{49}H_{89}N_3^+ 2PF_6^-$   | 58.26/58.31                           | 8.88/8.97   | 4.16/4.12 |
| <b>47</b>  | $C_{52}H_{96}N_4^+ 2PF_6^-$   | 58.52/58.14                           | 9.07/9.43   | 5.25/5.51 |
| <b>48a</b> | $C_{80}H_{148}N_4^+ 2PF_6^-$  | 67.57/67.89                           | 10.03/10.33 | 3.77/3.88 |
| <b>48b</b> | $C_{84}H_{156}N_4^+ 2PF_6^-$  | 65.34/65.22                           | 10.18/10.46 | 3.63/3.72 |
| <b>49</b>  | $C_{84}H_{160}N_4^+ 2PF_6^-$  | 66.54/66.98                           | 10.64/10.99 | 3.70/3.84 |
| <b>50</b>  | $C_{69}H_{123}N_4^+ 3PF_6^-$  | 57.41/57.15                           | 8.59/8.84   | 3.88/4.04 |
| <b>51</b>  | $C_{23}H_{42}NO^+ PF_6^-$     | 55.97/56.31                           | 8.58/8.81   | 2.84/2.96 |
| <b>52a</b> | $C_{35}H_{64}NO_2^+ PF_6^-$   | 62.20/62.34                           | 9.54/9.32   | 2.07/2.12 |
| <b>52b</b> | $C_{37}H_{68}NO_2^+ PF_6^-$   | 63.13/63.21                           | 9.74/9.55   | 1.99/2.03 |
| <b>52c</b> | $C_{39}H_{72}NO_2^+ PF_6^-$   | 64.00/64.08                           | 9.91/10.07  | 1.91/1.90 |
| <b>53</b>  | $C_{23}H_{43}N_2^+ PF_6^-$    | 56.08/56.42                           | 8.80/9.04   | 5.69/5.23 |
| <b>54a</b> | $C_{35}H_{65}N_2O^+ Cl^-$     | 74.36/74.02                           | 11.59/11.92 | 4.96/5.28 |
| <b>54b</b> | $C_{37}H_{69}N_2O^+ Cl^-$     | 74.89/74.96                           | 11.72/11.89 | 4.72/4.82 |
| <b>54c</b> | $C_{39}H_{73}N_2O^+ Cl^-$     | 75.37/75.70                           | 11.84/11.88 | 4.51/4.24 |
| <b>55</b>  | $C_{23}H_{42}NS^+ PF_6^-$     | 54.21/54.55                           | 8.31/8.63   | 2.75/3.02 |
| <b>56a</b> | $C_{33}H_{62}NS_2^+ PF_6^-$   | 58.12/58.37                           | 9.16/9.42   | 2.05/1.87 |
|            | $C_{33}H_{62}NS_2^+ Cl^-$     | 69.24/69.56                           | 10.92/11.05 | 2.45/2.09 |
| <b>56b</b> | $C_{35}H_{66}NS_2^+ PF_6^-$   | 59.21/59.41                           | 9.37/9.66   | 1.97/2.03 |
|            | $C_{35}H_{66}NS_2^+ Cl^-$     | 70.01/70.39                           | 11.08/11.31 | 2.33/2.64 |
| <b>56c</b> | $C_{37}H_{70}NS_2^+ PF_6^-$   | 60.21/60.49                           | 9.56/9.86   | 1.90/1.86 |
|            | $C_{37}H_{70}NS_2^+ Cl^-$     | 70.70/71.02                           | 11.23/11.48 | 2.23/2.38 |
| <b>57</b>  | $C_{46}H_{82}N_2S_2^+ PF_6^-$ | 54.31/54.21                           | 8.13/8.29   | 2.75/2.88 |
|            | $C_{46}H_{82}N_2S_2^+ Cl^-$   | 69.22/69.43                           | 10.35/10.63 | 3.51/3.23 |
